# Supplementary material
Source: PubMed Central journal article supplement (PMC11403119)
Supplement: NIHMS2022214-supplement-Supplemental_Material.pdf [file NIHMS2022214-supplement-Supplemental_Material.pdf]

# THE LANCET

## Infectious Diseases

### Supplementary appendix

This appendix formed part of the original submission and has been peer reviewed. We post it as supplied by the authors.

Supplement to: Whitehouse ER, Mandra A, Bonwitt J, et al. Human rabies despite post-exposure prophylaxis: a systematic review of fatal breakthrough infections after zoonotic exposures. *Lancet Infect Dis* 2022; published online Dec 16. [https://doi.org/10.1016/S1473-3099\(22\)00641-7](https://doi.org/10.1016/S1473-3099(22)00641-7).

## Appendix

|                                                                                                                                                                                 |           |
|---------------------------------------------------------------------------------------------------------------------------------------------------------------------------------|-----------|
| <b>Table S1: List of full literature search terms by database. ....</b>                                                                                                         | <b>2</b>  |
| <b>Table S2. WHO-approved regimens for rabies post-exposure prophylaxis. ....</b>                                                                                               | <b>5</b>  |
| <b>Table S3. Selected variables for breakthrough infections with no known deviations in core practices (N=54).....</b>                                                          | <b>6</b>  |
| <b>Table S4. Selected variables for breakthrough infections with potential or known deviations in core practices (N=68) .....</b>                                               | <b>15</b> |
| <b>Table S5. Demographic and exposure characteristics of 56 breakthrough infections among confirmed human rabies cases with or without deviations from core practices. ....</b> | <b>30</b> |
| <b>Table S6. Clinical characteristics of 56 breakthrough infections among confirmed human rabies cases with or without deviations from core practices. ....</b>                 | <b>31</b> |
| <b>Table S7. Potential causes of 56 breakthrough infections among confirmed human rabies cases with or without deviations from core practices. ....</b>                         | <b>32</b> |
| <b>References.....</b>                                                                                                                                                          | <b>33</b> |

**Table S1: List of full literature search terms by database.**

| Database                          | Strategy                                                                                                                                                                                                                                                                                                                                                                                                                                                                                                                                                                                                                                                                                                                | Run Date   | Records                                                        |
|-----------------------------------|-------------------------------------------------------------------------------------------------------------------------------------------------------------------------------------------------------------------------------------------------------------------------------------------------------------------------------------------------------------------------------------------------------------------------------------------------------------------------------------------------------------------------------------------------------------------------------------------------------------------------------------------------------------------------------------------------------------------------|------------|----------------------------------------------------------------|
| <b>Medline (OVID) 1946-</b>       | (Rabies ADJ5 vaccin*) OR (Rabies AND (Immunoglobulin* OR immuno-globulin* OR immune globulin* OR IG OR RIG OR ERIG OR HRIG OR passive immun* OR passive vaccin* OR passive antibod* OR fragment* OR Fab OR (F AND (ab*))) OR hyperRab OR Imogam OR Kedrab OR antirabies virus globulin* OR bayrab OR verirab OR berirab OR favirab OR antiserum* OR anti-serum* OR immune serum* OR rabigam OR rauman berna)).ti,ab.<br><br>AND<br><br>Post-exposure OR postexposure OR PEP OR (possible ADJ5 expos*) OR (potential* ADJ5 expos*) OR (suspect* ADJ5 expos*) OR (expos* ADJ5 infected) OR (expos* ADJ5 rabi*) OR fail OR failure* OR failed OR "Bites and Stings"/co,th<br><br>NOT<br><br>(Exp animals/ NOT exp humans/) | 12/13/2018 | 1418                                                           |
|                                   |                                                                                                                                                                                                                                                                                                                                                                                                                                                                                                                                                                                                                                                                                                                         | 7/8/2020   | 141                                                            |
|                                   |                                                                                                                                                                                                                                                                                                                                                                                                                                                                                                                                                                                                                                                                                                                         | 7/11/2022  | 140                                                            |
| <b>Embase (OVID) 1947-</b>        | (Rabies ADJ5 vaccin*) OR (Rabies AND (Immunoglobulin* OR immuno-globulin* OR immune globulin* OR IG OR RIG OR ERIG OR HRIG OR passive immun* OR passive vaccin* OR passive antibod* OR fragment* OR Fab OR (F AND (ab*))) OR hyperRab OR Imogam OR Kedrab OR antirabies virus globulin* OR bayrab OR verirab OR berirab OR favirab OR antiserum* OR anti-serum* OR immune serum* OR rabigam OR rauman berna)).ti,ab.<br><br>AND<br><br>Post-exposure OR postexposure OR PEP OR (possible ADJ5 expos*) OR (potential* ADJ5 expos*) OR (suspect* ADJ5 expos*) OR (expos* ADJ5 infected) OR (expos* ADJ5 rabi*) OR fail OR failure* OR failed OR "Bites and Stings"/co,dt<br><br>NOT<br><br>(Exp animal/ NOT exp human/)   | 12/13/2018 | 1645<br><br>-1027<br>duplicates<br><br>=618<br>unique<br>items |
|                                   |                                                                                                                                                                                                                                                                                                                                                                                                                                                                                                                                                                                                                                                                                                                         | 7/8/2020   | 194<br><br>-107<br>duplicates<br><br>=87 unique<br>items       |
|                                   |                                                                                                                                                                                                                                                                                                                                                                                                                                                                                                                                                                                                                                                                                                                         | 7/11/2022  | 188<br><br>-84<br>duplicates<br><br>=104<br>unique<br>items    |
| <b>Global Health (OVID) 1973-</b> | (Rabies ADJ5 vaccin*) OR (Rabies AND (Immunoglobulin* OR immuno-globulin* OR immune globulin* OR IG OR RIG OR ERIG OR HRIG OR passive immun* OR passive vaccin* OR passive antibod* OR fragment* OR Fab OR (F AND (ab*))) OR hyperRab OR Imogam OR Kedrab OR antirabies virus globulin* OR bayrab OR verirab OR berirab OR favirab OR antiserum* OR anti-serum* OR immune serum* OR rabigam OR rauman berna)).ti,ab.<br><br>AND<br><br>Post-exposure OR postexposure OR PEP OR (possible ADJ5 expos*) OR (potential* ADJ5 expos*) OR (suspect* ADJ5 expos*) OR (expos* ADJ5 infected) OR (expos* ADJ5 rabi*) OR fail OR failure* OR failed                                                                              | 12/13/2018 | 1335<br><br>-619<br>duplicates<br><br>= 716<br>unique<br>items |
|                                   |                                                                                                                                                                                                                                                                                                                                                                                                                                                                                                                                                                                                                                                                                                                         | 7/8/2020   | 117<br><br>-48<br>duplicates<br><br>=69<br>unique<br>items     |
|                                   |                                                                                                                                                                                                                                                                                                                                                                                                                                                                                                                                                                                                                                                                                                                         | 7/11/2022  | 129<br><br>-80<br>duplicates                                   |

|                             |                                                                                                                                                                                                                                                                                                                                                                                                                                                                                                                                                                                                                                                                                                                                                                                                                                                                                                                                                                                                                                                                                                      |            |                                                             |
|-----------------------------|------------------------------------------------------------------------------------------------------------------------------------------------------------------------------------------------------------------------------------------------------------------------------------------------------------------------------------------------------------------------------------------------------------------------------------------------------------------------------------------------------------------------------------------------------------------------------------------------------------------------------------------------------------------------------------------------------------------------------------------------------------------------------------------------------------------------------------------------------------------------------------------------------------------------------------------------------------------------------------------------------------------------------------------------------------------------------------------------------|------------|-------------------------------------------------------------|
|                             |                                                                                                                                                                                                                                                                                                                                                                                                                                                                                                                                                                                                                                                                                                                                                                                                                                                                                                                                                                                                                                                                                                      |            | =49<br>unique<br>items                                      |
| <b>CINAHL<br/>(Ebsco)</b>   | (Rabies N5 vaccin*) OR (TI (Rabies AND (Immunoglobulin* OR immuno-globulin* OR "immune globulin*" OR IG OR RIG OR ERIG OR HRIG OR "passive immun*" OR "passive vaccin*" OR "passive antibod*" OR fragment* OR Fab OR (F AND (ab*)) OR hyperRab OR Imogam OR Kedrab OR "antirabies virus globulin*" OR bayrab OR verirab OR berirab OR favirab OR antiserum* OR anti-serum* OR "immune serum*" OR rabigam OR "rauman berna"))) OR (AB (Rabies AND (Immunoglobulin* OR immuno-globulin* OR "immune globulin*" OR IG OR RIG OR ERIG OR HRIG OR "passive immun*" OR "passive vaccin*" OR "passive antibod*" OR fragment* OR Fab OR (F AND (ab*)) OR hyperRab OR Imogam OR Kedrab OR "antirabies virus globulin*" OR bayrab OR verirab OR berirab OR favirab OR antiserum* OR anti-serum* OR "immune serum*" OR rabigam OR "rauman berna")))<br><br>AND<br><br>Post-exposure OR postexposure OR PEP OR (possible N5 expos*) OR (potential* N5 expos*) OR (suspect* N5 expos*) OR (expos* N5 infected) OR (expos* N5 rabi*) OR fail OR failure* OR failed<br><br>Limiters Human ; exclude Medline journals | 12/13/2018 | 14<br><br>-9<br>duplicates<br><br>=5<br>unique<br>items     |
|                             |                                                                                                                                                                                                                                                                                                                                                                                                                                                                                                                                                                                                                                                                                                                                                                                                                                                                                                                                                                                                                                                                                                      | 7/8/2020   | 7<br>-6<br>duplicates<br><br>=1 unique<br>items             |
|                             |                                                                                                                                                                                                                                                                                                                                                                                                                                                                                                                                                                                                                                                                                                                                                                                                                                                                                                                                                                                                                                                                                                      | 7/11/2022  | 9<br><br>-7<br>duplicates<br><br>=2<br>unique<br>items      |
| <b>Cochrane<br/>Library</b> | ((Rabies NEAR/5 vaccin*) OR (Rabies AND (Immunoglobulin* OR immuno-globulin* OR "immune globulin*" OR IG OR RIG OR ERIG OR HRIG OR "passive immun*" OR "passive vaccin*" OR "passive antibod*" OR fragment* OR Fab OR (F AND (ab*)) OR hyperRab OR Imogam OR Kedrab OR "antirabies virus globulin*" OR bayrab OR verirab OR berirab OR favirab OR antiserum* OR anti-serum* OR "immune serum*" OR rabigam OR "rauman berna"))):ti,ab<br><br>AND<br><br>(Post-exposure OR postexposure OR PEP OR (possible NEAR/5 expos*) OR (potential* NEAR/5 expos*) OR (suspect* NEAR/5 expos*) OR (expos* NEAR/5 infected) OR (expos* NEAR/5 rabi*) OR fail OR failure* OR failed):ti,ab                                                                                                                                                                                                                                                                                                                                                                                                                         | 12/13/2018 | 116<br><br>-101<br>duplicates<br><br>=15<br>unique<br>items |
|                             |                                                                                                                                                                                                                                                                                                                                                                                                                                                                                                                                                                                                                                                                                                                                                                                                                                                                                                                                                                                                                                                                                                      | 7/8/2020   | 34<br><br>-9<br>duplicates<br><br>=25<br>unique<br>items    |
|                             |                                                                                                                                                                                                                                                                                                                                                                                                                                                                                                                                                                                                                                                                                                                                                                                                                                                                                                                                                                                                                                                                                                      | 7/11/2022  | 18<br><br>-10<br>duplicates<br><br>=8<br>unique<br>items    |

|                                                                                                                                                                                                                                                                                   |                                                                                                                                                                                                                                                                                                                                                                                                                                                                                                                                                                                                                                                                                                                                    |            |                                                        |
|-----------------------------------------------------------------------------------------------------------------------------------------------------------------------------------------------------------------------------------------------------------------------------------|------------------------------------------------------------------------------------------------------------------------------------------------------------------------------------------------------------------------------------------------------------------------------------------------------------------------------------------------------------------------------------------------------------------------------------------------------------------------------------------------------------------------------------------------------------------------------------------------------------------------------------------------------------------------------------------------------------------------------------|------------|--------------------------------------------------------|
| <b>Scopus</b>                                                                                                                                                                                                                                                                     | (TITLE-ABS-KEY(Rabies W/5 vaccin*) OR (TITLE-ABS-KEY(Rabies) AND TITLE-ABS-KEY(Immunoglobulin* OR immuno-globulin* OR "immune globulin*" OR IG OR RIG OR ERIG OR HRIG OR "passive immun*" OR "passive vaccin*" OR "passive antibod*" OR fragment* OR Fab OR (F AND (ab*)) OR hyperRab OR Imogam OR Kedrab OR "antirabies virus globulin*" OR bayrab OR verirab OR berirab OR favirab OR antiserum* OR anti-serum* OR "immune serum*" OR rabigam OR "rauman berna"))) AND (TITLE-ABS-KEY(Post-exposure OR postexposure OR PEP OR (possible W/5 expos*) OR (potential* W/5 expos*) OR (suspect* W/5 expos*) OR (expos* W/5 infected) OR (expos* W/5 rabi*) fail OR failure* OR failed)) AND NOT INDEX(medline) AND NOT INDEX(embase) | 12/13/2018 | 8<br><br>-5<br>duplicates<br><br>=3<br>unique<br>items |
|                                                                                                                                                                                                                                                                                   |                                                                                                                                                                                                                                                                                                                                                                                                                                                                                                                                                                                                                                                                                                                                    | 7/08/2020  | 0                                                      |
|                                                                                                                                                                                                                                                                                   |                                                                                                                                                                                                                                                                                                                                                                                                                                                                                                                                                                                                                                                                                                                                    | 7/11/2022  | 1<br><br>-0<br>duplicates<br><br>=1<br>unique<br>items |
| Note: Duplicates were identified using the Endnote automated "find duplicates" function with preference set to match on title, author and year, and removed from the Endnote library. Additional duplicates were identified using Covidence (Cochrane, Melbourne VIC, Australia). |                                                                                                                                                                                                                                                                                                                                                                                                                                                                                                                                                                                                                                                                                                                                    |            |                                                        |

**Table S2. WHO-approved regimens for rabies post-exposure prophylaxis.**

| WHO-approved regimens                                                    | Route of administration | Number of doses per day* | Days                |
|--------------------------------------------------------------------------|-------------------------|--------------------------|---------------------|
| ESSEN 6-dose (pre-2004) <sup>1</sup>                                     | IM                      | 1-1-1-1-1-1              | 0, 3, 7, 14, 28, 90 |
| ESSEN 5-dose (2004 to 2018) <sup>1,2</sup>                               | IM                      | 1-1-1-1-1                | 0, 3, 7, 14, 28     |
| ESSEN 4-dose (2018 to present) <sup>3</sup>                              | IM                      | 1-1-1-1-0                | 0, 3, 7, 14–28      |
| Thai Red Cross (pre-2004) <sup>1</sup>                                   | ID                      | 2-2-2-0-1-1              | 0, 3, 7, 28, 90     |
| Updated Thai Red Cross (2004 to 2018) <sup>1,2</sup>                     | ID                      | 2-2-2-0-2                | 0, 3, 7, 28         |
| Updated Thai Red Cross (2018 to present) <sup>3</sup>                    | ID                      | 2-2-2-0-0                | 0, 3, 7             |
| Zagreb (2004 to present) <sup>2</sup>                                    | IM                      | 2-0-1-0-1                | 0, 7, 21            |
| Eight-site intradermal regimen (2004 to 2013) <sup>2</sup>               | ID                      | 8-0-4-0-1-1              | 0, 7, 28, 90        |
| Alternative four-site intradermal regimen (2018 to present) <sup>3</sup> | ID                      | 4-4-4-0-0                | 0, 3, 7             |

\*Each number represents how many doses are given on a particular day; 0 means that no doses are given that day. Day 0 starts the date of vaccine initiation and the spacing of doses are day 0, 3, 7, 14, 21 or 28, and 90.  
 WHO: World Health Organization; IM: Intramuscular; ID: Intradermal.

**Table S3. Selected variables for breakthrough infections with no known deviations in core practices (N=54).**

| Publication*                           | Age (years) | Sex | Date of exposure | Country of exposure | RIG given | Immunocompromised as reported by the authors                      | WHO case classification† | Vaccine regimen (number and spacing of doses, administration route, reported deviations, name of regimen)                                                                                                                                                                                             | Reasons for breakthrough infection according to author                                                                                                                                                                                                     | Other relevant data                                                                              |
|----------------------------------------|-------------|-----|------------------|---------------------|-----------|-------------------------------------------------------------------|--------------------------|-------------------------------------------------------------------------------------------------------------------------------------------------------------------------------------------------------------------------------------------------------------------------------------------------------|------------------------------------------------------------------------------------------------------------------------------------------------------------------------------------------------------------------------------------------------------------|--------------------------------------------------------------------------------------------------|
| Amin, M et al. <sup>4</sup>            | 50          | M   | Unknown          | Bangladesh          | No        | Not stated                                                        | Probable                 | PVRV IM days 0, 3, 7, 14. ESSEN 5-dose. No schedule deviations reported. Developed symptoms the day he received his fourth dose (day 14).                                                                                                                                                             | RIG not administered.                                                                                                                                                                                                                                      |                                                                                                  |
| Bharti, OK et al. <sup>5</sup>         | 8           | F   | 2019             | India               | Yes       | Not stated                                                        | Confirmed                | PCEV ID days 0, 3, 7 (3 doses/day). This was reported as the "latest 2018 WHO regimen" although updated Thai Red Cross regimens recommend 2 dose/day and an alternative ID regimen is 4 doses/day, so we were unable to identify this regimen. Completed series with no schedule deviations reported. | Direct inoculation into facial nerve; head/neck wound; delay of 1 day for wound washing (not immediately done by family) and PEP; wound cleansed but not flushed per WHO recommendations.                                                                  |                                                                                                  |
| Chaitra, KM et al. <sup>6</sup>        | 4.5         | M   | Unknown          | India               | Yes       | Not stated                                                        | Confirmed                | PVRV days 0, 3, 7, 14, 28. Patient received IM doses day 0, 14, and ID days 3 and 7. ESSEN 5-dose. No deviations reported. Developed symptoms 11 days after 4th dose and was given 5th dose on day 28 while symptomatic.                                                                              | May have missed infiltrating wounds with RIG given large wound area; suturing of the wound; direct nerve inoculation of rabies virus.                                                                                                                      |                                                                                                  |
| Deshmukh, RA & Yemul, V L <sup>7</sup> | 64          | F   | Unknown          | India               | No        | Yes: uncontrolled diabetes, diabetic neuropathy, and endocarditis | Confirmed                | PVRV IM days 0, 3, 7, 14, 30. Specific regimen not stated. Completed series with no schedule deviations noted. Developed symptoms on day 23 prior to completion of series.                                                                                                                            | RIG not administered at time of exposure; patient immunocompromised (uncontrolled diabetes, diabetic neuropathy, and endarteritis); possible minor antigenic differences in infecting strain and vaccinating strain causing variable degree of protection. | Patient received RIG but was given after patient developed symptoms, one day prior to her death. |
| Dutta, JK <sup>8</sup>                 | 12          | M   | Unknown          | India               | No        | Not stated                                                        | Probable                 | PCEC received 4 doses. Administration route (IM/ID), vaccine spacing, and specific regimen not stated. No reported schedule deviations. Developed symptoms 10 days after 4th dose.                                                                                                                    | 5-day delay in administration of vaccine; RIG not administered; financial constraints contributed to delay in purchasing vaccine.                                                                                                                          |                                                                                                  |

| Publication*                    | Age (years) | Sex | Date of exposure | Country of exposure | RIG given | Immunocompromised as reported by the authors | WHO case classification† | Vaccine regimen (number and spacing of doses, administration route, reported deviations, name of regimen)                                                                                          | Reasons for breakthrough infection according to author                                        | Other relevant data  |
|---------------------------------|-------------|-----|------------------|---------------------|-----------|----------------------------------------------|--------------------------|----------------------------------------------------------------------------------------------------------------------------------------------------------------------------------------------------|-----------------------------------------------------------------------------------------------|----------------------|
| Farahatj, F et al. <sup>9</sup> | 0.92        | M   | 2008             | Iran                | No        | Not stated                                   | Confirmed                | Author confirmed either PCEC or PVRV vaccine days 0, 3, 7, 14. Vaccine type, administration site, and specific regimen not specified. Completed series with no reported deviations.                | RIG not administered.                                                                         |                      |
| Farahatj, F et al. <sup>9</sup> | 4           | M   | 2003             | Iran                | Yes       | Not stated                                   | Probable                 | Author confirmed either PCEC or PVRV vaccine days 0, 3, 7. Vaccine type, administration site, and specific regimen not specified. No reported deviations. Developed symptoms 1 day after 1st dose. | 40-day delay in vaccine and RIG administration; did not receive enough vaccine doses.         |                      |
| Farahatj, F et al. <sup>9</sup> | 6           | F   | 2002             | Iran                | Yes       | Not stated                                   | Confirmed                | Author confirmed either PCEC or PVRV vaccine days 0, 3, 7, 14. Vaccine type, administration site, and specific regimen not specified. Completed series with no reported deviations.                | Enhanced viral spread (maybe due to suturing) which facilitated entry into peripheral nerves. | Wounds were sutured. |
| Farahatj, F et al. <sup>9</sup> | 8           | M   | 2005             | Iran                | Yes       | Not stated                                   | Confirmed                | Author confirmed either PCEC or PVRV vaccine days 0, 3, 7, 14. Vaccine type, administration site, and specific regimen not specified. Completed series with no reported deviations.                | No specific reason given.                                                                     |                      |
| Farahatj, F et al. <sup>9</sup> | 9           | M   | 2006             | Iran                | Yes       | Not stated                                   | Probable                 | Author confirmed either PCEC or PVRV vaccine days 0, 3, 7, 14. Vaccine type, administration site, and specific regimen not specified. Completed series with no reported deviations.                | No specific reason given.                                                                     |                      |
| Farahatj, F et al. <sup>9</sup> | 10          | F   | 2009             | Iran                | No        | Not stated                                   | Confirmed                | Author confirmed either PCEC or PVRV vaccine days 0, 3, 7, 14. Vaccine type, administration site, and specific regimen not specified. Completed series with no reported deviations.                | RIG not administered.                                                                         |                      |
| Farahatj, F et al. <sup>9</sup> | 13          | M   | 2007             | Iran                | Yes       | Not stated                                   | Confirmed                | Author confirmed either PCEC or PVRV vaccine days 0, 3, 7, 14. Vaccine type, administration site, and specific regimen not specified. Completed series with no reported deviations.                | No specific reason given.                                                                     |                      |



| Publication*                     | Age (years) | Sex | Date of exposure | Country of exposure | RIG given | Immunocompromised as reported by the authors | WHO case classification† | Vaccine regimen (number and spacing of doses, administration route, reported deviations, name of regimen)                                                                           | Reasons for breakthrough infection according to author | Other relevant data |
|----------------------------------|-------------|-----|------------------|---------------------|-----------|----------------------------------------------|--------------------------|-------------------------------------------------------------------------------------------------------------------------------------------------------------------------------------|--------------------------------------------------------|---------------------|
| Farahataj, F et al. <sup>9</sup> | 23          | F   | 2003             | Iran                | Yes       | Not stated                                   | Probable                 | Author confirmed either PCEC or PVRV vaccine days 0, 3, 7, 14. Vaccine type, administration site, and specific regimen not specified. Completed series with no reported deviations. | No specific reason given.                              |                     |
| Farahataj, F et al. <sup>9</sup> | 26          | M   | 2003             | Iran                | Yes       | Not stated                                   | Probable                 | Author confirmed either PCEC or PVRV vaccine days 0, 3, 7, 14. Vaccine type, administration site, and specific regimen not specified. Completed series with no reported deviations. | No specific reason given.                              |                     |
| Farahataj, F et al. <sup>9</sup> | 39          | M   | 2006             | Iran                | Yes       | Not stated                                   | Confirmed                | Author confirmed either PCEC or PVRV vaccine days 0, 3, 7, 14. Vaccine type, administration site, and specific regimen not specified. Completed series with no reported deviations. | No specific reason given.                              |                     |
| Farahataj, F et al. <sup>9</sup> | 50          | M   | 2005             | Iran                | Yes       | Not stated                                   | Confirmed                | Author confirmed either PCEC or PVRV vaccine days 0, 3, 7, 14. Vaccine type, administration site, and specific regimen not specified. Completed series with no reported deviations. | 3-day delay of vaccine and RIG administration.         |                     |
| Farahataj, F et al. <sup>9</sup> | 50          | M   | 2006             | Iran                | Yes       | Not stated                                   | Confirmed                | Author confirmed either PCEC or PVRV vaccine. Vaccine type, administration site, and specific regimen not specified. Received one dose and developed symptoms the following day.    | 22-day delay of vaccine and RIG administration.        |                     |
| Farahataj, F et al. <sup>9</sup> | 58          | M   | 2010             | Iran                | No        | Not stated                                   | Confirmed                | Author confirmed either PCEC or PVRV vaccine days 0,3,7,14. Vaccine type, administration site, and specific regimen not specified. Completed series with no reported deviations.    | RIG not administered.                                  |                     |
| Farahataj, F et al. <sup>9</sup> | 67          | F   | 2011             | Iran                | Yes       | Not stated                                   | Confirmed                | Author confirmed either PCEC or PVRV vaccine days 0,3,7,14. Vaccine type, administration site, and specific regimen not specified. Completed series with no reported deviations.    | No specific reason given.                              |                     |

| Publication*                                                        | Age (years) | Sex | Date of exposure | Country of exposure | RIG given | Immunocompromised as reported by the authors | WHO case classification† | Vaccine regimen (number and spacing of doses, administration route, reported deviations, name of regimen)                                                                                  | Reasons for breakthrough infection according to author                                                                                                                                                                                                                  | Other relevant data                                                                                                                                                   |
|---------------------------------------------------------------------|-------------|-----|------------------|---------------------|-----------|----------------------------------------------|--------------------------|--------------------------------------------------------------------------------------------------------------------------------------------------------------------------------------------|-------------------------------------------------------------------------------------------------------------------------------------------------------------------------------------------------------------------------------------------------------------------------|-----------------------------------------------------------------------------------------------------------------------------------------------------------------------|
| Farahatj, F et al. <sup>9</sup>                                     | 80          | M   | 2006             | Iran                | Yes       | Not stated                                   | Probable                 | Author confirmed either PCEC or PVRV vaccine days 0,3,7,14. Vaccine type, administration site, and specific regimen not specified. Completed series with no reported deviations.           | No specific reason given.                                                                                                                                                                                                                                               |                                                                                                                                                                       |
| Fescharek, R et al. <sup>10</sup> and Wilde, H et al. <sup>11</sup> | 6           | M   | 1991             | India               | Yes       | Not stated                                   | Probable                 | PCEC IM days 0, 3, 7, 14. Regimen not specified. No deviations reported. Developed symptoms 2 days after the 4th injection.                                                                | Injuries on head/face; short incubation period could be caused by wound location or very virulent street virus; 1-day delay of RIG administration; ketamine administration as anesthesia and surgical stress could interfere with sufficient immune response.           | No suturing was done, but patient had surgery on face with ketamine given as anesthesia. Had 8-year-old brother bitten by the same dog who received PEP and survived. |
| Fescharek, R et al. <sup>12</sup>                                   | 3           | M   | 1990             | India               | No        | Not stated                                   | Probable                 | PCEC 4 doses. Administration site, vaccine spacing, and regimen not specified. No deviations reported. Developed symptoms 5 days after the 4th dose.                                       | Delay of more than 24 hours in giving PEP; RIG not administered; multiple wounds especially in high-risk areas like head, neck, arm, or fingers.                                                                                                                        |                                                                                                                                                                       |
| Fescharek, R et al. <sup>12</sup>                                   | 4           | M   | 1990             | India               | Yes       | Not stated                                   | Probable                 | PCEC IM 4 doses. Vaccine spacing and regimen not specified. No deviations reported. Developed symptoms 3 days after the 4th dose.                                                          | Delay of more than 24 hours in giving PEP; multiple wounds.                                                                                                                                                                                                             | Wound was sutured.                                                                                                                                                    |
| Fescharek, R et al. <sup>12</sup>                                   | 41          | F   | 1990             | India               | No        | Not stated                                   | Probable                 | PCEC IM 4 doses. Vaccine spacing and regimen not specified. No deviations reported. Developed symptoms 2 days after the 4th dose.                                                          | No RIG administered.                                                                                                                                                                                                                                                    |                                                                                                                                                                       |
| Gacouin, A et al. <sup>13</sup>                                     | 50          | F   | 1996             | India               | No        | No                                           | Confirmed                | PCEC IM days 0, 2 in India then PVRV IM days 6, 16, 29 in France. Regimen not specified. Developed symptoms 5 days after 3rd dose. Deviations of 1-3 days noted in presumed ESSEN regimen. | Suturing wound closed; RIG not administered; could not verify conservation of vaccine at 4 degrees C; co-administration of chloroquine and proguanil antimalarial could delay antibody response; short incubation period; severity of bite; particular strain of virus. | Patient tested negative for HIV.                                                                                                                                      |

| Publication*                                                  | Age (years) | Sex | Date of exposure | Country of exposure | RIG given | Immunocompromised as reported by the authors | WHO case classification† | Vaccine regimen (number and spacing of doses, administration route, reported deviations, name of regimen)                                                  | Reasons for breakthrough infection according to author                                                                                                                               | Other relevant data                                                    |
|---------------------------------------------------------------|-------------|-----|------------------|---------------------|-----------|----------------------------------------------|--------------------------|------------------------------------------------------------------------------------------------------------------------------------------------------------|--------------------------------------------------------------------------------------------------------------------------------------------------------------------------------------|------------------------------------------------------------------------|
| Hemachudha, T et al. <sup>14</sup> and Wilde, H <sup>15</sup> | 9           | M   | 1997             | Thailand            | Yes       | Not stated                                   | Confirmed                | PCEC IM days 0, 3, 7, 14. Regimen not specified. Completed series with no reported deviations.                                                             | Direct inoculation of nerve endings.                                                                                                                                                 |                                                                        |
| Hemachudha, T et al. <sup>14</sup> and Wilde, H <sup>15</sup> | 72          | F   | 1997             | Thailand            | Yes       | Not stated                                   | Confirmed                | PVRV IM day 0 then PCEC IM days 3, 7, 14. Regimen not specified. Completed series with no reported deviations.                                             | Direct inoculation of nerve endings.                                                                                                                                                 |                                                                        |
| Jain, RS et al. <sup>16</sup>                                 | 55          | M   | Unknown          | India               | Yes       | Not stated                                   | Probable                 | PCEC ID days 0, 3, 7, 28 (2 doses/day). Updated Thai Red Cross pre-2018. Completed series with no reported deviations.                                     | Large injection of viral load given of multiple, large, and deep bite; unintentional missed infiltration of RIG into wounds by healthcare providers; unusual strain of rabies virus. |                                                                        |
| John, BM et al. <sup>17</sup> and Wilde, H <sup>15</sup>      | 5           | F   | Unknown          | India               | Yes       | Not stated                                   | Confirmed                | PCEC IM days 0, ?, 7, 14. Regimen not specified and could not confirm day of 2nd dose. Developed symptoms 3 days after 4th dose.                           | Limited infiltration of RIG due to anatomic location of wound (near left eye); suturing of wound; short incubation period.                                                           |                                                                        |
| Khalsi, F et al. <sup>18</sup>                                | 11          | M   | Unknown          | Tunisia             | Yes       | Not stated                                   | Confirmed                | PCEC IM days 0, 3, 7, 14. ESSEN 4-dose. Completed series with no reported deviations.                                                                      | High risk head/neck injury; wound was sutured prior to cleaning and RIG administration.                                                                                              |                                                                        |
| Quiambao, BP et al. <sup>19</sup> and Wilde, H <sup>15</sup>  | 6           | M   | 2006             | Philippines         | Yes       | Not stated                                   | Confirmed                | PVRV ID day 0 (2 doses/day) then PVRV IM day 3, 7. Unclear if regimen was Thai Red Cross or ESSEN or mix of both. Patient developed symptoms on day 22.    | No disinfectant applied after washing wounds with soap and water; 2-day delay for vaccine and RIG administration; location of wound on lip made RIG infiltration challenging.        |                                                                        |
| Ren, J et al. <sup>20</sup>                                   | 5           | M   | Unknown          | China               | Yes       | Not stated                                   | Probable                 | Modern cell culture days 0 (2 doses), 7, 21. Zagreb. Vaccine type, administration site, schedule not stated. Completed series with no reported deviations. | No specific reason given.                                                                                                                                                            | Patient given ketamine. Wound sutured closed before RIG administration |

| Publication*                                                | Age (years) | Sex | Date of exposure | Country of exposure | RIG given | Immunocompromised as reported by the authors | WHO case classification† | Vaccine regimen (number and spacing of doses, administration route, reported deviations, name of regimen)                                                                                                                                        | Reasons for breakthrough infection according to author                                                                                                                                                            | Other relevant data                                                                                                                                                                                                                  |
|-------------------------------------------------------------|-------------|-----|------------------|---------------------|-----------|----------------------------------------------|--------------------------|--------------------------------------------------------------------------------------------------------------------------------------------------------------------------------------------------------------------------------------------------|-------------------------------------------------------------------------------------------------------------------------------------------------------------------------------------------------------------------|--------------------------------------------------------------------------------------------------------------------------------------------------------------------------------------------------------------------------------------|
| Scrimgeour, EM & Mehta, FR <sup>21</sup>                    | 17          | F   | 1997             | Oman                | Yes       | Not stated                                   | Confirmed                | HDCV IM day 0 (2 doses), 6. Zagreb. Received 3 doses with a one-day deviation of the 2nd session. Developed symptoms 7 days after 2nd visit.                                                                                                     | 48-hour delay in RIG administration; deep wound in upper lip.                                                                                                                                                     | RIG was given IM only with no wound infiltration.                                                                                                                                                                                    |
| Shantavasinkul, P et al. <sup>22</sup>                      | 33          | M   | 2009             | Thailand            | Yes       | Not stated                                   | Confirmed                | PCEC ID days 0, 3, 7 (2 doses/day). Updated Thai Red Cross pre-2018. No reported deviations. Developed symptoms day 23 before completing series.                                                                                                 | 2nd dose of RIG given on day 4 which could have increased trauma to nerves at bite site; missing other wounds with RIG; 2nd RIG dose given on day 4; wound on nail bed challenging to infiltrate.                 | RIG potency confirmed.                                                                                                                                                                                                               |
| Smith, MS & Janse van Rensburg, M N <sup>23</sup>           | 18          | M   | Unknown          | South Africa        | No        | Not stated                                   | Probable                 | HDCV SQ days 0, 3 and IM days 7, 14, 23. Regimen not stated. Completed series with deviation of 5th dose given 5 days early.                                                                                                                     | RIG not administered; 9-day delay in vaccine administration; administration of first two doses of vaccine subcutaneous.                                                                                           |                                                                                                                                                                                                                                      |
| Sriaroon, C et al. <sup>24</sup> and Wilde, H <sup>15</sup> | 7           | F   | 2002             | Thailand            | No        | Not stated                                   | Probable                 | PCEC ID day 0 (8 doses), day 7 (4 doses). Eight-site intradermal regimen. No reported deviations. Developed symptoms 4 days after 2nd visit.                                                                                                     | RIG not administered.                                                                                                                                                                                             |                                                                                                                                                                                                                                      |
| Thongcharoen, P & Wasi, C <sup>25</sup>                     | 65          | M   | 1984             | Thailand            | Yes       | Yes: alcoholic cirrhosis                     | Confirmed                | Suckling mouse brain vaccine 5 doses daily. Administration route unknown. Day 7 post-exposure started HDCV days 0, 3, 7, 14. Administration route and regimen not stated. No reported deviations. Developed symptoms 8 days after 4th HDCV dose. | 7-day delay in receiving cell culture vaccine (started on suckling mouse brain vaccine); liver impairment causing poor antibody response.                                                                         | Patient had several reported co-morbidities: history of drug use, chronic hemorrhoids, alcoholic cirrhosis, asthma, and duodenal ulcer. Antibody response 12 days after 4th dose of HDCV was 1.87 IU/ml when expect it be ~10 IU/ml. |
| Tinsa, F et al. <sup>26</sup>                               | 6           | M   | Unknown          | Tunisia             | Yes       | Not stated                                   | Confirmed                | PCEC IM days 0, 3, 7, 14. ESSEN. Completed series with no reported deviations.                                                                                                                                                                   | Wound sutured early on the same day as the bite (after RIG); Highly innervated wound in the head/neck; speculated on the possibility of wound management error or missing small wounds for infiltration with RIG. |                                                                                                                                                                                                                                      |

| Publication*                                                                   | Age (years) | Sex | Date of exposure | Country of exposure | RIG given | Immunocompromised as reported by the authors    | WHO case classification† | Vaccine regimen (number and spacing of doses, administration route, reported deviations, name of regimen)                                                     | Reasons for breakthrough infection according to author                                                                                                                                                                                                                         | Other relevant data                                                                                                  |
|--------------------------------------------------------------------------------|-------------|-----|------------------|---------------------|-----------|-------------------------------------------------|--------------------------|---------------------------------------------------------------------------------------------------------------------------------------------------------------|--------------------------------------------------------------------------------------------------------------------------------------------------------------------------------------------------------------------------------------------------------------------------------|----------------------------------------------------------------------------------------------------------------------|
| Wattanasri, S et al. <sup>27</sup> and Thongcharoen, P & Wasi, C <sup>25</sup> | 35          | F   | 1980             | Thailand            | No        | Not stated                                      | Probable                 | HDCV days 0, 2, 7, 13. Administration site and regimen not specified. Potential deviation with dose 2 of 1 day. Developed symptoms 6 days after 4th dose.     | RIG not administered; 2-day delay in vaccine administration.                                                                                                                                                                                                                   |                                                                                                                      |
| Wilde, H et al. <sup>11</sup>                                                  | 2.5         | F   | Unknown          | Thailand            | Yes       | Not stated                                      | Probable                 | PCEC ID days 0, 3, 7 (2 doses/day) Thai Red Cross. No reported deviations. Developed symptoms 3 days after 3rd visit.                                         | Wound sutured closed before RIG was administered, which can enhance spread of viral and rapid viral entry into peripheral nerves; not all wounds were infiltrated with RIG.                                                                                                    |                                                                                                                      |
| Wilde, H et al. <sup>11</sup>                                                  | 4           | M   | 1993             | Sri Lanka           | Yes       | Not stated                                      | Confirmed                | PCEC IM days 0, 7, 21 (2 doses/day). Zagreb. Completed series with no schedule deviations reported.                                                           | Use of Zagreb regimen which was not recommended when RIG is given (category 3 wounds) because of reported antibody suppression with co-administration of regimen and RIG. Only half of the RIG was used in wounds so may not have had sufficient RIG to infiltrate all wounds. | Patient wounds were sutured with ketamine as anesthetic. At this time, guidelines did not recommend diluting RIG.    |
| Wilde, H et al. <sup>11</sup>                                                  | 6           | M   | 1988             | Thailand            | Yes       | Not stated                                      | Probable                 | PVRV IM days 0,3,7. ESSEN. No reported deviations. Died 5 days after the 3rd dose.                                                                            | No infiltration of RIG into wounds; high risk exposure because head/neck wounds.                                                                                                                                                                                               |                                                                                                                      |
| Wilde, H et al. <sup>11</sup>                                                  | 9           | M   | 1989             | Thailand            | Yes       | Not stated                                      | Confirmed                | PVRV IM days 0, 3,7, 14. ESSEN. No deviations reported. Died 11 days after the 4th dose.                                                                      | Undiluted RIG volume was inadequate to infiltrate 12 wounds on face, head, and arms.                                                                                                                                                                                           | Confirmed vaccine and RIG potency.                                                                                   |
| Wilde, H et al. <sup>28</sup>                                                  | 11          | M   | 1986             | Thailand            | Yes       | No                                              | Confirmed                | PVRV IM days 0, 3,10, 13 IM. Essen (not clear if 5 or 6 dose). Deviation of 3 days (3rd dose) and 4 days (4th dose). Developed symptoms 1 day after 4th dose. | 5-day delay in vaccine and RIG administration; wounds not infiltrated with RIG.                                                                                                                                                                                                | Provider recommended observing animal before starting PEP resulting in a 5-day delay. Patient reported as "healthy." |
| Wilde, H et al. <sup>28</sup>                                                  | 53          | M   | 1988             | Thailand            | Yes       | Yes: Chronic alcoholism with advanced cirrhosis | Confirmed                | PVRV ID days, 0, 3, 7 (2 doses/day) Thai Red Cross. No deviations reported. Developed symptoms 11 days after 3rd visit.                                       | 6-day delay in administration of vaccine and RIG. Alcoholism and cirrhosis contributed to poor immune response to vaccine.                                                                                                                                                     |                                                                                                                      |

| Publication*           | Age (years) | Sex | Date of exposure | Country of exposure | RIG given | Immunocompromised as reported by the authors | WHO case classification† | Vaccine regimen (number and spacing of doses, administration route, reported deviations, name of regimen)                                                                                                                           | Reasons for breakthrough infection according to author                                                                               | Other relevant data                                                                  |
|------------------------|-------------|-----|------------------|---------------------|-----------|----------------------------------------------|--------------------------|-------------------------------------------------------------------------------------------------------------------------------------------------------------------------------------------------------------------------------------|--------------------------------------------------------------------------------------------------------------------------------------|--------------------------------------------------------------------------------------|
| Wilde, H <sup>15</sup> | 2           | F   | 1994             | Thailand            | Yes       | Not stated                                   | Probable                 | PCEC ID days 0, 3, 7 (2 doses/day). Thailand Red Cross. No reported deviations. Developed symptoms 3 days after the 3rd visit.                                                                                                      | RIG was not diluted so possible not all wounds were infiltrated with RIG; wounds were sutured potentially before RIG administration. | Wounds were sutured under ketamine anesthesia.                                       |
| Wilde, H <sup>15</sup> | 4           | F   | 2004             | Philippines         | Yes       | Not stated                                   | Confirmed                | PCEC ID days 0, 3, 7 (2 doses/day). Thailand Red Cross. No reported deviations. Developed symptoms 12 days after the 3rd visit.                                                                                                     | Reported as probable true PEP failure.                                                                                               |                                                                                      |
| Wilde, H <sup>15</sup> | 4           | M   | 2006             | South Africa        | Yes       | Not stated                                   | Confirmed                | HDCV IM days 0, 3, 7, 14 IM. Regimen not specified, likely ESSEN five-dose. Developed symptoms 4 days after 4th dose.                                                                                                               | Reported as probable true PEP failure.                                                                                               |                                                                                      |
| Wilde, H <sup>15</sup> | 7           | M   | 2001             | Thailand            | Yes       | Not stated                                   | Probable                 | PVRV IM day 0 then PVRV ID days 3, 7 (2 doses/day). Started IM and then Thai Red Cross ID. No reported deviations. Developed symptoms 13 days after 3rd visit.                                                                      | Reported as probable true PEP failure.                                                                                               |                                                                                      |
| Wilde, H <sup>15</sup> | 9           | M   | 1987             | Thailand            | Yes       | Not stated                                   | Confirmed                | PVRV IM days 0, 3, 7, 14. Regimen not specified, likely ESSEN 5-dose. No reported deviations. Developed symptoms 7 days after 4th dose.                                                                                             | Undiluted RIG was inadequate volume so cover all wounds.                                                                             |                                                                                      |
| Wilde, H <sup>15</sup> | 41          | M   | 1985             | Thailand            | Yes       | Not stated                                   | Probable                 | HDCV IM days 0, 2, 5. Regimen not stated. Schedule deviation 1 day early (dose 2) and 4 days early (dose 3). Developed symptoms 7 days after 3rd dose.                                                                              | RIG not infiltrated in wounds.                                                                                                       | Patient received HDCV 8 sites ID on the day that he started with symptoms of rabies. |
| Wilde, H <sup>15</sup> | 44          | F   | 2005             | Burma               | Yes       | Not stated                                   | Probable                 | PCEC IM days 0, 3, 7. Regimen not stated, likely ESSEN. No deviations but given that patient developed symptoms within 1 day of administration of 4th dose, she was counted as a case that developed symptoms instead of incomplete | Wound was sutured prior to RIG administration.                                                                                       | Potency of RIG and vaccine confirmed.                                                |

| Publication*                                                                                                                                                                                                                                                                                                                                                                                                                                                                                                                                                                                   | Age (years) | Sex | Date of exposure | Country of exposure | RIG given | Immunocompromised as reported by the authors | WHO case classification† | Vaccine regimen (number and spacing of doses, administration route, reported deviations, name of regimen)                                  | Reasons for breakthrough infection according to author                             | Other relevant data                                                                                  |
|------------------------------------------------------------------------------------------------------------------------------------------------------------------------------------------------------------------------------------------------------------------------------------------------------------------------------------------------------------------------------------------------------------------------------------------------------------------------------------------------------------------------------------------------------------------------------------------------|-------------|-----|------------------|---------------------|-----------|----------------------------------------------|--------------------------|--------------------------------------------------------------------------------------------------------------------------------------------|------------------------------------------------------------------------------------|------------------------------------------------------------------------------------------------------|
|                                                                                                                                                                                                                                                                                                                                                                                                                                                                                                                                                                                                |             |     |                  |                     |           |                                              |                          | vaccination. Developed symptoms 8 days after 3rd dose.                                                                                     |                                                                                    |                                                                                                      |
| Wilde, H <sup>15</sup>                                                                                                                                                                                                                                                                                                                                                                                                                                                                                                                                                                         | 53          | M   | 1987             | Thailand            | Yes       | Not stated                                   | Confirmed                | PVRV ID days 0, 3, 6 (2 doses/day). Thai Red Cross. Deviation of 1 day (3rd visit). Symptoms started 14 days after 3rd visit.              | 6-day delay in vaccine and RIG administration. RIG not administered in all wounds. | Vaccine and RIG administration was delayed while dog was observed, and rabies testing was completed. |
| Wilde, H <sup>15</sup>                                                                                                                                                                                                                                                                                                                                                                                                                                                                                                                                                                         | 57          | M   | 2004             | South Africa        | Yes       | Not stated                                   | Confirmed                | HDCV or PCEC IM days 0, 3, 7, 14. Regimen not stated, likely ESSEN 5-dose. No reported deviations. Developed symptoms the day of 4th dose. | Reported as probable true PEP failure.                                             | Mongoose had to be manually removed from patient.                                                    |
| <p>* If a manuscript has two publications listed, the first one was the primary source.</p> <p>† Characterized as suspected, probable, or confirmed rabies cases based on standard definitions developed by WHO, which classifies cases based on clinical symptoms, history of contact with a rabid animal, and laboratory testing.<sup>3</sup></p> <p>WHO: World Health Organization; M: Male; F:Female; PVRV: Purified Vero cell rabies vaccine; PCEC: Purified chick embryo cell rabies vaccine; HDCV: Human diploid cell vaccine; IM: Intramuscular; ID: Intradermal; SQ: Subcutaneous</p> |             |     |                  |                     |           |                                              |                          |                                                                                                                                            |                                                                                    |                                                                                                      |

**Table S4. Selected variables for breakthrough infections with potential or known deviations in core practices (N=68).**

| Publication*                         | Age (yrs) | Sex | Date of exp | Country of exposure | RIG given | Core practice: Wound care done | Core practice: Vaccine given in the gluteal muscle | Core practice: Vaccine completed | Reason for vaccine non-completion   | Immuno-compromised as reported by the authors | WHO case classification† | Vaccine regimen (number and spacing of doses, administration route, reported deviations, name of regimen)                                                                                                                       | Reasons for breakthrough infection according to author | Other relevant data |
|--------------------------------------|-----------|-----|-------------|---------------------|-----------|--------------------------------|----------------------------------------------------|----------------------------------|-------------------------------------|-----------------------------------------------|--------------------------|---------------------------------------------------------------------------------------------------------------------------------------------------------------------------------------------------------------------------------|--------------------------------------------------------|---------------------|
| Bennasrallah, C et al. <sup>29</sup> | 12        | M   | 2015        | Tunisia             | Unk       | Unk                            | Unk                                                | Yes                              |                                     | Not stated                                    | Probable                 | Authors confirmed modern cell culture vaccine and reported as ESSEN 5-dose. Administration site, vaccine spacing not specified. No reported deviations. Reported to have completed vaccine series.                              | Poor wound management; wound suturing.                 |                     |
| Bennasrallah, C et al. <sup>29</sup> | 33        | Unk | 2017        | Tunisia             | Unk       | Unk                            | Unk                                                | No                               | Did not return for additional doses | Not stated                                    | Probable                 | Authors confirmed modern cell culture vaccine and reported as ESSEN 5-dose. Administration site, vaccine spacing not specified. No reported deviations. Reported as incomplete PEP because the patient did not return for care. | Did not receive enough vaccine doses.                  |                     |
| Bharti, OK & Sharma, V <sup>30</sup> | 48        | M   | 2017        | India               | No        | Yes                            | Yes                                                | Developed symptoms               |                                     | Not stated                                    | Probable                 | Modern cell culture vaccine IM x 4 doses. Vaccine spacing and regimen not stated, reported as 5-dose regimen. No reported deviations. Patient developed symptoms after 4th dose.                                                | Administration of vaccine in the gluteal muscle.       |                     |
| Changalucha, J et al. <sup>31</sup>  | 3         | F   | Unk         | Tanzania            | No        | Unk                            | Unk                                                | Yes                              |                                     | Not stated                                    | Probable                 | Author confirmed modern cell culture vaccine IM x 4 doses. Vaccine spacing and regimen not specified. No reported deviations.                                                                                                   | 4-day delay in vaccine administration.                 |                     |
| Changalucha, J et al. <sup>31</sup>  | 3         | M   | Unk         | Tanzania            | No        | Unk                            | Unk                                                | Yes                              |                                     | Not stated                                    | Probable                 | Author confirmed modern cell culture vaccine IM x 3 doses. Vaccine spacing and                                                                                                                                                  | 1-day delay in vaccine administration.                 |                     |



| Publication*                        | Age (yrs) | Sex | Date of exp | Country of exposure | RIG given | Core practice: Wound care done | Core practice: Vaccine given in the gluteal muscle | Core practice: Vaccine completed | Reason for vaccine non-completion | Immuno-compromised as reported by the authors | WHO case classification† | Vaccine regimen (number and spacing of doses, administration route, reported deviations, name of regimen)                     | Reasons for breakthrough infection according to author                        | Other relevant data |
|-------------------------------------|-----------|-----|-------------|---------------------|-----------|--------------------------------|----------------------------------------------------|----------------------------------|-----------------------------------|-----------------------------------------------|--------------------------|-------------------------------------------------------------------------------------------------------------------------------|-------------------------------------------------------------------------------|---------------------|
|                                     |           |     |             |                     |           |                                |                                                    |                                  |                                   |                                               |                          | regimen not specified. No reported deviations.                                                                                |                                                                               |                     |
| Changalucha, J et al. <sup>31</sup> | 5         | M   | Unk         | Tanzania            | No        | Unk                            | Unk                                                | No                               | Unk                               | Not stated                                    | Probable                 | Author confirmed modern cell culture vaccine IM day 0. Regimen not specified. No reported deviations.                         | 3-day delay in vaccine administration; did not receive enough vaccine doses.  |                     |
| Changalucha, J et al. <sup>31</sup> | 6         | F   | Unk         | Tanzania            | No        | Unk                            | Unk                                                | No                               | Unk                               | Not stated                                    | Probable                 | Author confirmed modern cell culture vaccine IM x 2 doses. Vaccine spacing and regimen not specified. No reported deviations. | 10-day delay in vaccine administration; did not receive enough vaccine doses. |                     |
| Changalucha, J et al. <sup>31</sup> | 7         | M   | Unk         | Tanzania            | No        | Unk                            | Unk                                                | No                               | Unk                               | Not stated                                    | Probable                 | Author confirmed modern cell culture vaccine IM x 2 doses. Vaccine spacing and regimen not specified. No reported deviations. | 1-day delay in vaccine administration; did not receive enough vaccine doses.  |                     |
| Changalucha, J et al. <sup>31</sup> | 8         | F   | Unk         | Tanzania            | No        | Unk                            | Unk                                                | No                               | Unk                               | Not stated                                    | Probable                 | Author confirmed modern cell culture vaccine IM x 2 doses. Vaccine spacing and regimen not specified. No reported deviations. | 1-day delay in vaccine administration; did not receive enough vaccine doses.  |                     |
| Changalucha, J et al. <sup>31</sup> | 8         | M   | Unk         | Tanzania            | No        | Unk                            | No                                                 | No                               | Unk                               | Not stated                                    | Probable                 | Author confirmed modern cell culture vaccine ID day 0. Regimen not specified. No reported deviations.                         | Did not receive enough vaccine doses.                                         |                     |
| Changalucha, J et al. <sup>31</sup> | 9         | M   | Unk         | Tanzania            | No        | Unk                            | No                                                 | No                               | Unk                               | Not stated                                    | Probable                 | Author confirmed modern cell culture vaccine ID day 0. Regimen not specified. No reported deviations.                         | Did not receive enough vaccine doses.                                         |                     |
| Changalucha, J et al. <sup>31</sup> | 11        | M   | Unk         | Tanzania            | No        | Unk                            | No                                                 | No                               | Unk                               | Not stated                                    | Probable                 | Author confirmed modern cell culture vaccine ID x2 doses. Vaccine spacing and                                                 | Did not receive enough vaccine doses.                                         |                     |

| Publication*                        | Age (yrs) | Sex | Date of exp | Country of exposure | RIG given | Core practice: Wound care done | Core practice: Vaccine given in the gluteal muscle | Core practice: Vaccine completed | Reason for vaccine non-completion | Immuno-compromised as reported by the authors | WHO case classification† | Vaccine regimen (number and spacing of doses, administration route, reported deviations, name of regimen)                                                                                           | Reasons for breakthrough infection according to author                       | Other relevant data                                                                                                     |
|-------------------------------------|-----------|-----|-------------|---------------------|-----------|--------------------------------|----------------------------------------------------|----------------------------------|-----------------------------------|-----------------------------------------------|--------------------------|-----------------------------------------------------------------------------------------------------------------------------------------------------------------------------------------------------|------------------------------------------------------------------------------|-------------------------------------------------------------------------------------------------------------------------|
|                                     |           |     |             |                     |           |                                |                                                    |                                  |                                   |                                               |                          | regimen not specified. No reported deviations.                                                                                                                                                      |                                                                              |                                                                                                                         |
| Changalucha, J et al. <sup>31</sup> | 14        | M   | Unk         | Tanzania            | No        | Unk                            | Unk                                                | Yes                              |                                   | Not stated                                    | Probable                 | Author confirmed modern cell culture vaccine IM x 4 doses. Vaccine spacing and regimen not specified. No reported deviations.                                                                       | 5-day delay in vaccine administration.                                       |                                                                                                                         |
| Changalucha, J et al. <sup>31</sup> | 16        | M   | Unk         | Tanzania            | No        | Unk                            | Unk                                                | No                               | Unk                               | Not stated                                    | Probable                 | Author confirmed modern cell culture vaccine IM x 2 doses. Vaccine spacing and regimen not specified. No reported deviations.                                                                       | 6-day delay in vaccine administration; did not receive enough vaccine doses. |                                                                                                                         |
| Changalucha, J et al. <sup>31</sup> | 21        | M   | Unk         | Tanzania            | No        | Unk                            | Unk                                                | No                               | Unk                               | Not stated                                    | Probable                 | Author confirmed modern cell culture vaccine IM day 0. Regimen not specified. No reported deviations.                                                                                               | 1-day delay in vaccine administration; did not receive enough vaccine doses. |                                                                                                                         |
| Changalucha, J et al. <sup>31</sup> | 70        | F   | Unk         | Tanzania            | No        | Unk                            | No                                                 | No                               | Unk                               | Not stated                                    | Probable                 | Author confirmed modern cell culture vaccine ID day 0. Regimen not specified. No reported deviations.                                                                                               | Did not receive enough vaccine doses.                                        |                                                                                                                         |
| Changalucha, J et al. <sup>31</sup> | 85        | M   | Unk         | Tanzania            | No        | Unk                            | No                                                 | No                               | Unk                               | Not stated                                    | Probable                 | Author confirmed modern cell culture vaccine ID day 0. Regimen not specified. No reported deviations.                                                                                               | Did not receive enough vaccine doses.                                        |                                                                                                                         |
| Deshmukh, DG et al. <sup>32</sup>   | 3         | M   | 2009        | India               | No        | No                             | Unk                                                | Developed symptoms               |                                   | Not stated                                    | Confirmed                | PCEC days 0, 5, 11, 14. ESSEN 5-dose. Administration route not stated. Deviations noted 2 days late (dose 2), 1 day late (dose 3), 4 days early (dose 4). Developed symptoms 4 days after 4th dose. | No wound care done; RIG not administered.                                    | RIG was not administered because the hospital did not have it available, and the family could not afford to pay for it. |

| Publication*                                                                 | Age (yrs) | Sex | Date of exp | Country of exposure | RIG given | Core practice: Wound care done | Core practice: Vaccine given in the gluteal muscle | Core practice: Vaccine completed | Reason for vaccine non-completion | Immuno-compromised as reported by the authors | WHO case classification† | Vaccine regimen (number and spacing of doses, administration route, reported deviations, name of regimen)                                                                | Reasons for breakthrough infection according to author                                                                                                                                                         | Other relevant data                                                                            |
|------------------------------------------------------------------------------|-----------|-----|-------------|---------------------|-----------|--------------------------------|----------------------------------------------------|----------------------------------|-----------------------------------|-----------------------------------------------|--------------------------|--------------------------------------------------------------------------------------------------------------------------------------------------------------------------|----------------------------------------------------------------------------------------------------------------------------------------------------------------------------------------------------------------|------------------------------------------------------------------------------------------------|
| Devriendt, J et al. <sup>33</sup>                                            | 29        | F   | 1981        | Rwanda              | No        | Unk                            | Unk                                                | Developed symptoms               |                                   | Not stated                                    | Confirmed                | HDCV days 0, 3, 7, 14, ESSEN 6-dose. Administration route not specified. No reported deviations. Developed symptoms 6 days after 4th dose.                               | RIG not administered.                                                                                                                                                                                          | Vaccine potency confirmed. Patient received RIG after developed symptoms.                      |
| Farahtaj, F et al. <sup>9</sup>                                              | 20        | M   | 2003        | Iran                | Yes       | Yes                            | Unk                                                | No                               | Unk                               | Not stated                                    | Probable                 | Author confirmed either PCEC or PVRV vaccine days 0, 3, 7. Vaccine type, administration site, and specific regimen not specified. No reported deviations.                | 1- day delay in vaccine and RIG administration; did not receive enough vaccine doses.                                                                                                                          |                                                                                                |
| Fescharek, R & Franke, V <sup>34</sup> and Fescharek, R et al. <sup>12</sup> | 15        | M   | 1989        | Not stated          | No        | Yes                            | Yes                                                | Developed symptoms               |                                   | Not stated                                    | Probable                 | PCEC IM days 0, 3, 7, 14. Regimen not stated. Received dose 1-2 in gluteal muscle & 3-4 in arm. No reported deviations. Developed symptoms 13 days after 4th dose.       | RIG not administered; after symptoms developed, patient was diagnosed with post-vaccine Guillain-Barré syndrome and given high dose steroids vaccination before rabies diagnosis but after symptoms developed. | Patient diagnosed with typhoid fever 3 days after exposure and given antibiotics.              |
| Fescharek, R. et al. <sup>12</sup>                                           | 7         | M   | 1989        | India               | No        | No                             | No                                                 | Developed symptoms               |                                   | Not stated                                    | Probable                 | PCEC days 0, X, X, 16. Vaccine schedule, administration route, and regimen not stated. No deviations reported. Developed symptoms 8 days after 4th dose.                 | >24-hour delay in vaccine administration; RIG not administered; multiple wounds especially in high-risk areas like head, neck, arm, or fingers.                                                                |                                                                                                |
| Fescharek, R. et al. <sup>12</sup>                                           | 11        | F   | 1987        | India               | No        | Unk                            | Unk                                                | Unk                              |                                   | Not stated                                    | Probable                 | PCEC days 0, X, 12. Vaccine schedule, administration route, and regimen not stated. Unable to evaluate if there were deviations but no WHO regimen has dose 3 on day 12. | >24-hour delay in vaccine administration; multiple wounds especially in high-risk areas like head, neck, arm, or fingers.                                                                                      | HRIG was given 3 days after patient started with symptoms of rabies as a treatment not as PEP. |

| Publication*                       | Age (yrs) | Sex | Date of exp | Country of exposure | RIG given | Core practice: Wound care done | Core practice: Vaccine given in the gluteal muscle | Core practice: Vaccine completed | Reason for vaccine non-completion | Immuno-compromised as reported by the authors | WHO case classification† | Vaccine regimen (number and spacing of doses, administration route, reported deviations, name of regimen)                                                                                                             | Reasons for breakthrough infection according to author                                                                                                     | Other relevant data |
|------------------------------------|-----------|-----|-------------|---------------------|-----------|--------------------------------|----------------------------------------------------|----------------------------------|-----------------------------------|-----------------------------------------------|--------------------------|-----------------------------------------------------------------------------------------------------------------------------------------------------------------------------------------------------------------------|------------------------------------------------------------------------------------------------------------------------------------------------------------|---------------------|
|                                    |           |     |             |                     |           |                                |                                                    |                                  |                                   |                                               |                          | Developed symptoms 10 days after 3rd dose.                                                                                                                                                                            |                                                                                                                                                            |                     |
| Fescharek, R. et al. <sup>12</sup> | 11        | M   | 1990        | India               | No        | Yes                            | Unk                                                | Unk                              |                                   | Not stated                                    | Confirmed                | PCEC days 0, X, X, 14. Vaccine schedule, administration route, and regimen not stated. No deviations reported. According to vaccine card only one dose was given.                                                     | RIG not administered.                                                                                                                                      |                     |
| Fescharek, R. et al. <sup>12</sup> | 12        | M   | 1990        | India               | Unk       | Unk                            | Unk                                                | Developed symptoms               |                                   | Not stated                                    | Probable                 | PCEC days 0, X, 7. Vaccine schedule, administration route, and regimen not stated. No deviations reported. Developed symptoms 2 days after 3rd dose.                                                                  | RIG not administered; multiple wounds especially in high-risk areas like head, neck, arm, or fingers.                                                      |                     |
| Fescharek, R. et al. <sup>12</sup> | 12        | M   | 1989        | India               | No        | Unk                            | Yes                                                | Developed symptoms               |                                   | Not stated                                    | Probable                 | PCEC days 0, X, X, 14. Vaccine schedule, administration route, and regimen not stated. No deviations reported. Developed symptoms 2 days after 4th dose.                                                              | >24-hour delay in vaccine administration; RIG not administered; multiple wounds especially in high-risk areas like head, neck, arm, or fingers.            |                     |
| Fescharek, R. et al. <sup>12</sup> | 26        | F   | 1986        | Thailand            | Yes       | Unk                            | Yes                                                | Developed symptoms               |                                   | Not stated                                    | Probable                 | PCEC days 0, X, X, 21. Vaccine schedule, administration route, and regimen not stated. Unable to evaluate if there were deviations but no WHO regimen has dose 4 on day 21. Developed symptoms 2 days after 4th dose. | >24-hour delay in vaccine administration; wounds not infiltrated with RIG; multiple wounds especially in high-risk areas like head, neck, arm, or fingers. |                     |

| Publication*                                                         | Age (yrs) | Sex | Date of exp | Country of exposure | RIG given | Core practice: Wound care done | Core practice: Vaccine given in the gluteal muscle                                                            | Core practice: Vaccine completed | Reason for vaccine non-completion | Immuno-compromised as reported by the authors | WHO case classification† | Vaccine regimen (number and spacing of doses, administration route, reported deviations, name of regimen)                                                                                            | Reasons for breakthrough infection according to author                                                                                                                                                                                                        | Other relevant data                                                                           |
|----------------------------------------------------------------------|-----------|-----|-------------|---------------------|-----------|--------------------------------|---------------------------------------------------------------------------------------------------------------|----------------------------------|-----------------------------------|-----------------------------------------------|--------------------------|------------------------------------------------------------------------------------------------------------------------------------------------------------------------------------------------------|---------------------------------------------------------------------------------------------------------------------------------------------------------------------------------------------------------------------------------------------------------------|-----------------------------------------------------------------------------------------------|
| Fescharek, R. et al. <sup>12</sup>                                   | 65        | M   | 1989        | India               | No        | Unk                            | Unk                                                                                                           | Developed symptoms               |                                   | Not stated                                    | Probable                 | PCEC days 0, X, 7. Vaccine schedule, administration route, and regimen not stated. No reported deviations. Developed symptoms 7 days after 3rd dose.                                                 | >24-hour delay in vaccine administration; RIG not administered.                                                                                                                                                                                               |                                                                                               |
| Fescharek, R. et al. <sup>12</sup>                                   | 79        | M   | 1987        | India               | No        | Unk                            | No                                                                                                            | No                               | Unk                               | Not stated                                    | Probable                 | PCEC day 0. Administration route and regimen not stated.                                                                                                                                             | >24-hour delay in vaccine administration; RIG not administered.                                                                                                                                                                                               |                                                                                               |
| Fescharek, R. et al. <sup>12</sup> and Bock, HL et al. <sup>35</sup> | 65        | M   | 1986        | Thailand            | No        | Yes                            | Ukn: Reported as upper arm by Fescharek et al. Bock et al. reports as possible gluteal muscle administration. | No                               | Unk                               | Yes: Alcoholism with liver cirrhosis          | Probable                 | PCEC IM days 0, 2, 8. Regimen not stated and conflicting reports on route of administration (arm vs gluteal). Deviation noted 1-day early for dose 2 & 3. Developed symptoms 12 days after 3rd dose. | >24-hour delay in vaccine administration; RIG not administered; multiple wounds especially in high-risk areas like head, neck, arm, or fingers; suturing the wound; immunocompromised due to alcoholism; administration in gluteal muscle (Bock et al. only). |                                                                                               |
| Gadekar, RD et al. <sup>36</sup>                                     | 30        | M   | 2010        | India               | No        | No                             | Unk                                                                                                           | Developed symptoms               |                                   | Not stated                                    | Probable                 | Modern cell culture vaccine IM days 0, 3, 7, 14. ESSEN 5-dose. Vaccine type not stated. No deviations. Developed symptoms after 4th dose.                                                            | Wound care not done; RIG not administered; bite on highly innervated, higher risk site (finger).                                                                                                                                                              | 3-year-old also bitten by same animal. He received wound care, RIG and vaccine, and survived. |
| Gajurel, BP <sup>37</sup>                                            | 17        | M   | Unk         | Nepal               | Unk       | Unk                            | Unk                                                                                                           | Unk                              |                                   | Not stated                                    | Probable                 | PCEC 4 doses. Administration site, vaccine spacing, and regimen not specified. No reported deviations. Developed symptoms 5 days after the 4th dose.                                                 | Multiple bites leading to shorter incubation period; Unk if RIG was administered.                                                                                                                                                                             |                                                                                               |

| Publication*                   | Age (yrs) | Sex | Date of exp | Country of exposure | RIG given | Core practice: Wound care done | Core practice: Vaccine given in the gluteal muscle | Core practice: Vaccine completed | Reason for vaccine non-completion | Immuno-compromised as reported by the authors | WHO case classification† | Vaccine regimen (number and spacing of doses, administration route, reported deviations, name of regimen)                                                                                                 | Reasons for breakthrough infection according to author                                       | Other relevant data                                  |
|--------------------------------|-----------|-----|-------------|---------------------|-----------|--------------------------------|----------------------------------------------------|----------------------------------|-----------------------------------|-----------------------------------------------|--------------------------|-----------------------------------------------------------------------------------------------------------------------------------------------------------------------------------------------------------|----------------------------------------------------------------------------------------------|------------------------------------------------------|
| Gerber, F et al. <sup>38</sup> | 5         | M   | 2017        | Côte d'Ivoire       | No        | Unk                            | Unk                                                |                                  | Developed symptoms                | Not stated                                    | Probable                 | PCEC day 0. Administration site and regimen not specified. No reported deviations. Patient died same day as receiving vaccine.                                                                            | 61-day delay in vaccine administration.                                                      |                                                      |
| Gerber, F et al. <sup>38</sup> | 6         | M   | 2017        | Côte d'Ivoire       | Yes       | Unk                            | Unk                                                | No                               | Unk                               | Not stated                                    | Probable                 | PCEC 3 doses. Reported as Updated Thai Red Cross regimen (pre-2018). Administration site and vaccine spacing not specified. No reported deviations. Date of death unknown but within 6 weeks of exposure. | 2-day delay in vaccine administration.                                                       | Patient noted to have been scratched and not bitten. |
| Gerber, F et al. <sup>38</sup> | 10        | F   | 2017        | Côte d'Ivoire       | No        | Unk                            | Unk                                                |                                  | Developed symptoms                | Not stated                                    | Probable                 | PCEC day 0. Reported as Updated Thai Red Cross regimen (pre-2018). Administration site not specified. No reported deviations. Patient died 2 days after receiving 1st dose.                               | 55-day delay in vaccine administration.                                                      |                                                      |
| Gerber, F et al. <sup>38</sup> | 13        | F   | 2017        | Côte d'Ivoire       | No        | Unk                            | Unk                                                |                                  | Developed symptoms                | Not stated                                    | Probable                 | PCEC day 0. Administration site, vaccine spacing, number of doses, and regimen not specified. No reported deviations. Patient died one day after receiving 1st dose of vaccine.                           | 65-day delay in vaccine administration.                                                      |                                                      |
| Gerber, F et al. <sup>38</sup> | 25        | M   | 2017        | Côte d'Ivoire       | Yes       | Unk                            | Unk                                                |                                  | Developed symptoms                | Not stated                                    | Probable                 | PCEC. Administration site, vaccine spacing, number of doses received, and regimen not specified. No reported deviations. Patient died before completing the series.                                       | 28-day delay in vaccine administration; "non-compliance to the active vaccination protocol." |                                                      |

| Publication*                     | Age (yrs) | Sex | Date of exp | Country of exposure | RIG given | Core practice: Wound care done | Core practice: Vaccine given in the gluteal muscle | Core practice: Vaccine completed | Reason for vaccine non-completion | Immuno-compromised as reported by the authors | WHO case classification† | Vaccine regimen (number and spacing of doses, administration route, reported deviations, name of regimen)                                                                                                    | Reasons for breakthrough infection according to author  | Other relevant data                                                                  |
|----------------------------------|-----------|-----|-------------|---------------------|-----------|--------------------------------|----------------------------------------------------|----------------------------------|-----------------------------------|-----------------------------------------------|--------------------------|--------------------------------------------------------------------------------------------------------------------------------------------------------------------------------------------------------------|---------------------------------------------------------|--------------------------------------------------------------------------------------|
| Gerber, F et al. <sup>38</sup>   | 33        | F   | 2017        | Côte d'Ivoire       | Yes       | Unk                            | Unk                                                | Developed symptoms               |                                   | Not stated                                    | Probable                 | PCEC. Reported as Updated Thai Red Cross regimen (pre-2018). Administration site and vaccine spacing not specified. No reported deviations. Patient died while receiving PEP regimen, specific date unknown. | 3-day delay in vaccine administration.                  |                                                                                      |
| Ghosh, JB et al. <sup>39</sup>   | 6         | F   | Unk         | Presumed India      | No        | Unk                            | No                                                 | Developed symptoms               |                                   | Not stated                                    | Confirmed                | PCEC IM 0, 3, 7, 14. ESSEN 5-dose. No reported deviations. Developed symptoms after 4th dose.                                                                                                                | RIG not administered.                                   |                                                                                      |
| Ghosh, JB et al. <sup>39</sup>   | 10        | M   | Unk         | Presumed India      | No        | Unk                            | No                                                 | Developed symptoms               |                                   | Not stated                                    | Probable                 | PCEC IM 0, 3, 7, 14. ESSEN 5-dose. No reported deviations. Developed symptoms 4 days after 4th dose.                                                                                                         | RIG not administered.                                   |                                                                                      |
| Gowda, VK et al. <sup>40</sup>   | 15        | F   | Unk         | India               | No        | No                             | No                                                 | Yes                              |                                   | Not stated                                    | Confirmed                | Modern cell culture vaccine ID days 0, 3, 7, 14, 28 (2 doses/day). Updated Thai Red Cross (reported as 2-2-2-2-2). Vaccine type not stated. No deviations reported and completed schedule.                   | RIG not administered.                                   | Reported as a category III cat scratch.                                              |
| Kumar, SK et al. <sup>41**</sup> | 29        | M   | 2019        | India               | No        | Unk                            | Unk                                                | Yes                              |                                   | Not stated                                    | Confirmed                | PCEC days 0, 3, 7, 14, 21. Likely ESSEN 5-dose. Administration site and regimen not specified. No reported deviations.                                                                                       | RIG not administered or possibly true vaccine failures. |                                                                                      |
| Kumar, SK et al. <sup>41**</sup> | 58        | F   | 2019        | India               | No        | Unk                            | Unk                                                | Unk                              |                                   | Not stated                                    | Confirmed                | PCEC days 0, 3, 7. Administration site and regimen not specified. No reported deviations.                                                                                                                    | RIG not administered or possibly true vaccine failures. | Hospitalized for 16 days and then died one day after leaving against medical advice. |

| Publication*                             | Age (yrs) | Sex | Date of exp | Country of exposure | RIG given | Core practice: Wound care done | Core practice: Vaccine given in the gluteal muscle | Core practice: Vaccine completed | Reason for vaccine non-completion | Immuno-compromised as reported by the authors                        | WHO case classification† | Vaccine regimen (number and spacing of doses, administration route, reported deviations, name of regimen)                                                                                           | Reasons for breakthrough infection according to author                                                                                                                                          | Other relevant data                                                                                                                                                                                                             |
|------------------------------------------|-----------|-----|-------------|---------------------|-----------|--------------------------------|----------------------------------------------------|----------------------------------|-----------------------------------|----------------------------------------------------------------------|--------------------------|-----------------------------------------------------------------------------------------------------------------------------------------------------------------------------------------------------|-------------------------------------------------------------------------------------------------------------------------------------------------------------------------------------------------|---------------------------------------------------------------------------------------------------------------------------------------------------------------------------------------------------------------------------------|
| Kuwert, E & Scheiermann, N <sup>42</sup> | 60        | F   | 1982        | Iran                | Yes       | No                             | Unk                                                | Developed symptoms               |                                   | Yes: Age-related immunodeficiency could not be excluded              | Confirmed                | HDCV days 0, 3, 7, 14. Administration route and regimen not stated. No deviations reported. Developed symptoms day of 4th dose.                                                                     | No wound care with disinfectants; wounds not infiltrated with RIG; severe lesions near central nervous system (i.e., face, eye, and possibly intra-eye); possible age-related immunodeficiency. | Viral strain was tested and did not show increased antigenicity compared with standard rabies virus. Authors noted RIG was dosed for a 40 kg person which could also indicate malnutrition and contributed to immunodeficiency. |
| Lumbiganon, P et al. <sup>43</sup>       | 10        | M   | 1987        | Thailand            | Yes       | Yes                            | Yes                                                | Developed symptoms               |                                   | Not stated                                                           | Confirmed                | Suckling mouse rabies vaccine x1 dose. HDCV IM days 0, 2, 6, 13. Regimen not stated. Based on ESSEN spacing deviation of 1-day (dose 2), 3-days (dose 3). Developed symptoms 8 days after 4th dose. | Administration of vaccine in gluteal muscle; wound care did not include antiviral or anti-septic; severe wounds to the head with higher risk for rabies.                                        |                                                                                                                                                                                                                                 |
| Madhusudana, SN et al. <sup>44</sup>     | 12        | M   | Unk         | India               | Yes       | No                             | Unk                                                | Developed symptoms               |                                   | Not stated                                                           | Confirmed                | PCEC IM days 0, 3, 7. "WHO regimen," likely ESSEN. No reported deviations. Developed symptoms 8 days after 3rd dose.                                                                                | No immediate wound cleaning with antiseptic; unpredictable incubation period of rabies (e.g., some <2 weeks) so insufficient time to developed antibodies.                                      |                                                                                                                                                                                                                                 |
| Mohindra, R et al. <sup>45</sup>         | 51        | M   | Unk         | India               | Yes       | Unk                            | Unk                                                | Yes                              |                                   | Yes: Chronic lymphoproliferative leukemia for which he completed six | Probable                 | Modern cell culture vaccine, days 0, 3, 7, 14, 28. Likely ESSEN 5-dose. Administration site, vaccine type, and regimen not specified. No                                                            | Failure to achieve adequate rabies antibody titers post-vaccination because of underlying immunocompromising                                                                                    |                                                                                                                                                                                                                                 |



| Publication*                        | Age (yrs) | Sex | Date of exp | Country of exposure | RIG given | Core practice: Wound care done | Core practice: Vaccine given in the gluteal muscle | Core practice: Vaccine completed                   | Reason for vaccine non-completion   | Immuno-compromised as reported by the authors                        | WHO case classification† | Vaccine regimen (number and spacing of doses, administration route, reported deviations, name of regimen)                                                                                         | Reasons for breakthrough infection according to author                                                                                                                                       | Other relevant data |
|-------------------------------------|-----------|-----|-------------|---------------------|-----------|--------------------------------|----------------------------------------------------|----------------------------------------------------|-------------------------------------|----------------------------------------------------------------------|--------------------------|---------------------------------------------------------------------------------------------------------------------------------------------------------------------------------------------------|----------------------------------------------------------------------------------------------------------------------------------------------------------------------------------------------|---------------------|
|                                     |           |     |             |                     |           |                                |                                                    |                                                    |                                     | cycles of bendamustine and rituximab 2-3 months before his exposure. |                          | reported deviations. Patient died after completing vaccine series.                                                                                                                                | condition; hypothesized inappropriate storage of vaccine leading to reduced potency, faulty infection technique with the route or site of vaccine administration, or inadequate dose of RIG. |                     |
| Mohite, A et al. <sup>46</sup>      | 12        | M   | Unk         | Presumed India      | No        | Unk                            | Unk                                                | Either developed symptoms or completed the series. |                                     | Not stated                                                           | Confirmed                | PCEC x 4 doses. Vaccine spacing, administration route, and regimen not stated. Developed symptoms after 4th dose. Either developed symptoms (if 5-dose regimen) or completed (if 4-dose regimen). | RIG not administered.                                                                                                                                                                        |                     |
| Monson, MH <sup>47</sup>            | 16        | M   | 1982        | Liberia             | Unk       | Unk                            | Unk                                                | No                                                 | Did not return for additional doses | Not stated                                                           | Probable                 | HDCV day 0. Administration route and regimen not specified.                                                                                                                                       | Did not receive enough vaccine doses. RIG not administered;                                                                                                                                  |                     |
| Nadeem, M & Panda, PK <sup>48</sup> | 58        | F   | Unk         | India               | No        | Unk                            | Unk                                                | No                                                 | Incorrect dosing (3 doses at once)  | Not stated                                                           | Confirmed                | PCEC day 0 (3 doses in one day). Administration route and regimen not specified.                                                                                                                  | >6-hour delay in vaccine administration; wounds in highly innervated area (e.g., face); Incorrect administration of vaccine (3 doses x 1 day).                                               |                     |
| Pannu, AK et al. <sup>49</sup>      | 50        | M   | Unk         | India               | No        | No                             | Unk                                                | Yes                                                |                                     | Not stated                                                           | Confirmed                | PVRV day 0, X, X, X. Vaccine spacing, administration route, and regimen not specified. Completed series with no deviations reported.                                                              | RIG not administered.                                                                                                                                                                        |                     |

| Publication*                    | Age (yrs) | Sex | Date of exp | Country of exposure | RIG given | Core practice: Wound care done           | Core practice: Vaccine given in the gluteal muscle | Core practice: Vaccine completed | Reason for vaccine non-completion                                                                 | Immuno-compromised as reported by the authors | WHO case classification† | Vaccine regimen (number and spacing of doses, administration route, reported deviations, name of regimen) | Reasons for breakthrough infection according to author                                                                                               | Other relevant data |
|---------------------------------|-----------|-----|-------------|---------------------|-----------|------------------------------------------|----------------------------------------------------|----------------------------------|---------------------------------------------------------------------------------------------------|-----------------------------------------------|--------------------------|-----------------------------------------------------------------------------------------------------------|------------------------------------------------------------------------------------------------------------------------------------------------------|---------------------|
| Rasooli, A et al. <sup>50</sup> | 10        | M   | 2016        | Iran                | Yes       | Yes: Reported as improper wound cleaning | Unk                                                | Developed symptoms               |                                                                                                   | Not stated                                    | Confirmed                | PVRV IM days 0, 3, 7. ESSEN 5-dose. No reported deviations. Developed symptoms 4 days after 3rd dose.     | Improper wound cleaning; RIG not infiltrated in the wound, given IM only.                                                                            |                     |
| Rasooli, A et al. <sup>50</sup> | 32        | M   | 2016        | Iran                | Yes       | Unk                                      | Unk                                                | Yes                              |                                                                                                   | Not stated                                    | Confirmed                | PVRV IM days 0, 3, 7, 14, 28. ESSEN 5-dose. No reported deviations. Completed vaccine series.             | RIG not infiltrated in the wound, given IM only.                                                                                                     |                     |
| Rasooli, A et al. <sup>50</sup> | 46        | F   | 2017        | Iran                | Yes       | Unk                                      | Unk                                                | Developed symptoms               |                                                                                                   | Not stated                                    | Confirmed                | PVRV IM days 0, 3, 7, 14. ESSEN 5-dose. No reported deviations. Developed symptoms 8 days after 4th dose. | RIG not infiltrated in the wound, given IM only; suturing of the wound; direct inoculation of the virus into the nerve.                              |                     |
| Rasooli, A et al. <sup>50</sup> | 50        | M   | 2016        | Iran                | Yes       | Yes: Reported as improper wound cleaning | Unk                                                | Developed symptoms               |                                                                                                   | Not stated                                    | Confirmed                | PVRV IM days 0, 3, 7, 14. ESSEN 5-dose. No reported deviations. Developed symptoms 4 days after 4th dose. | Improper wound cleaning; RIG not infiltrated in the wound, given IM only.                                                                            |                     |
| Rasooli, A et al. <sup>50</sup> | 55        | M   | 2015        | Iran                | Yes       | Unk                                      | Unk                                                | Yes                              |                                                                                                   | Not stated                                    | Confirmed                | PVRV IM days 0, 3, 7, 14, 28. ESSEN 5-dose. No reported deviations. Completed vaccine series              | Reported as "delayed PEP" although states that first vaccine was given immediately after bite.                                                       |                     |
| Rasooli, A et al. <sup>50</sup> | 58        | M   | 2018        | Iran                | Yes       | Unk                                      | Unk                                                | Developed symptoms               | Yes: Reported as having an "advanced immunodeficiency" on long-term immunosuppressive medication. |                                               | Confirmed                | PVRV IM days 0, 3, 7, 14. ESSEN 5-dose. No reported deviations. Developed symptoms 4 days after 4th dose. | Head wound very close to the brain; direct inoculation of the virus into the nerve; immunodeficiency leading to poor immune response to vaccination. |                     |

| Publication*                                             | Age (yrs) | Sex | Date of exp | Country of exposure                | RIG given | Core practice: Wound care done | Core practice: Vaccine given in the gluteal muscle | Core practice: Vaccine completed | Reason for vaccine non-completion | Immuno-compromised as reported by the authors | WHO case classification† | Vaccine regimen (number and spacing of doses, administration route, reported deviations, name of regimen)                                                                             | Reasons for breakthrough infection according to author                                                                            | Other relevant data                                                                                                                                                                                                                                                                       |
|----------------------------------------------------------|-----------|-----|-------------|------------------------------------|-----------|--------------------------------|----------------------------------------------------|----------------------------------|-----------------------------------|-----------------------------------------------|--------------------------|---------------------------------------------------------------------------------------------------------------------------------------------------------------------------------------|-----------------------------------------------------------------------------------------------------------------------------------|-------------------------------------------------------------------------------------------------------------------------------------------------------------------------------------------------------------------------------------------------------------------------------------------|
| Rasooli, A et al. <sup>50</sup>                          | 67        | M   | 2018        | Iran                               | Yes       | Unk                            | Unk                                                |                                  | Developed symptoms                | Not stated                                    | Confirmed                | PVRV IM days 0, 3, 7, 14. ESSEN 5-dose. No reported deviations. Developed symptoms 11 days after 4th dose.                                                                            | Injection of the vaccine and RIG into the same anatomical location.                                                               |                                                                                                                                                                                                                                                                                           |
| Sadeghi, M et al. <sup>51</sup>                          | 67        | F   | Unk         | Iran                               | Yes       | Unk                            | No                                                 |                                  | Developed symptoms                | Not stated                                    | Confirmed                | HDCV IM days 0, 3, 7. ESSEN 5-dose. No deviations reported. Developed symptoms 2 days after 3rd dose.                                                                                 | No specific reason given.                                                                                                         |                                                                                                                                                                                                                                                                                           |
| Shill, M et al. <sup>52</sup> and Wilde, H <sup>15</sup> | 19        | M   | 1987        | South Africa                       | Yes       | Yes                            | Yes                                                |                                  | Developed symptoms                | No                                            | Confirmed                | HDCV IM days 0, 3, 7, 14. ESSEN 5-dose. No deviations reported. Developed symptoms 7 days after the 4th dose.                                                                         | Administration of vaccine in the gluteal muscle.                                                                                  | Patient had low titers, but authors could not explain this finding; authors reported that patient was HIV negative with no history of substance abuse that could lead to immunosuppression. A 2nd patient was vaccinated with same lot had appropriate titers. Vaccine potency confirmed. |
| Tabbara, KF & Al-Omar, O <sup>53</sup>                   | 7         | F   | Unk         | Not stated (presumed Saudi Arabia) | Yes       | Unk                            | Unk                                                |                                  | Developed symptoms                | Not stated                                    | Probable                 | HDCV. ESSEN 5-dose. Administration route, vaccine schedule, and how many doses received not stated. No deviations reported. Developed symptoms 14 days after starting vaccine series. | >48-hour delay in vaccine administration; proximity of laceration to the cranial nerves; amount of rabies virus inoculated large. | Patient had sister who also was bitten in the face near eyelid by the same fox but received PEP and survived.                                                                                                                                                                             |

| Publication*                      | Age (yrs) | Sex | Date of exp | Country of exposure | RIG given | Core practice: Wound care done | Core practice: Vaccine given in the gluteal muscle | Core practice: Vaccine completed | Reason for vaccine non-completion | Immuno-compromised as reported by the authors | WHO case classification† | Vaccine regimen (number and spacing of doses, administration route, reported deviations, name of regimen)                                                | Reasons for breakthrough infection according to author                                                                                                                                                                                                 | Other relevant data                                                                                                                                                                                                                                                                                                                                             |
|-----------------------------------|-----------|-----|-------------|---------------------|-----------|--------------------------------|----------------------------------------------------|----------------------------------|-----------------------------------|-----------------------------------------------|--------------------------|----------------------------------------------------------------------------------------------------------------------------------------------------------|--------------------------------------------------------------------------------------------------------------------------------------------------------------------------------------------------------------------------------------------------------|-----------------------------------------------------------------------------------------------------------------------------------------------------------------------------------------------------------------------------------------------------------------------------------------------------------------------------------------------------------------|
| Tarantola, A et al. <sup>54</sup> | 5         | M   | 2008        | Cambodia            | Yes       | Unk                            | No                                                 | No                               | Unk                               | Not stated                                    | Probable                 | PVRV ID days 0, 3, 7 (2 doses/day). Updated Thai Red Cross pre-2018. No deviations noted. Patient developed symptoms and died 39 days after 3rd session. | Several bites to highly innervated areas; suspected but could not confirm errors in PEP administration (e.g., failure to infiltrate all of the wounds with RIG) because two patients were seen at the clinic that day who later also developed rabies. | Patient treated the same day at the same clinic as another case (37-year-old M from Tarantola, A. et al. <sup>51</sup> ) who also developed rabies with a PEP failure. Authors reported either RIG/vaccine potency confirmed by manufacturer or because given to another patient with an exposure to a confirmed rabid animal who did not get rabies after PEP. |
| Tarantola, A et al. <sup>54</sup> | 9         | M   | 2011        | Cambodia            | Yes       | Unk                            | No                                                 | Developed symptoms               |                                   | Not stated                                    | Probable                 | PVRV ID days 0, 3, 7 (2 doses/day). Updated Thai Red Cross pre-2018. No deviations noted. Developed symptoms and died 12 days after 3rd session.         | Several bites to highly innervated areas (i.e., head); short incubation period associated with direct delivery of RABV into nervous ending.                                                                                                            | Patient with extensive head wounds that were sutured before PEP. Authors reported either RIG/vaccine potency confirmed by manufacturer or because given to another patient with an exposure to a confirmed rabid animal who did not get rabies after PEP.                                                                                                       |

| Publication*                            | Age (yrs) | Sex | Date of exp | Country of exposure | RIG given | Core practice: Wound care done | Core practice: Vaccine given in the gluteal muscle | Core practice: Vaccine completed | Reason for vaccine non-completion      | Immuno-compromised as reported by the authors | WHO case classification† | Vaccine regimen (number and spacing of doses, administration route, reported deviations, name of regimen)                                       | Reasons for breakthrough infection according to author                                                                                                                                                                                                                                                                                                      | Other relevant data                                                                                                                                                                                                                                                                                                                  |
|-----------------------------------------|-----------|-----|-------------|---------------------|-----------|--------------------------------|----------------------------------------------------|----------------------------------|----------------------------------------|-----------------------------------------------|--------------------------|-------------------------------------------------------------------------------------------------------------------------------------------------|-------------------------------------------------------------------------------------------------------------------------------------------------------------------------------------------------------------------------------------------------------------------------------------------------------------------------------------------------------------|--------------------------------------------------------------------------------------------------------------------------------------------------------------------------------------------------------------------------------------------------------------------------------------------------------------------------------------|
| Tarantola, A et al. <sup>54</sup>       | 37        | M   | 2008        | Cambodia            | Yes       | Unk                            | No                                                 | Developed symptoms               |                                        | Not stated                                    | Probable                 | PVRV ID days 0, 3, 7 (2 doses/day). Updated Thai Red Cros pre-2018. No deviations noted. Developed symptoms and died 12 days after 3rd session. | Several bites to highly innervated areas (i.e., finger); short incubation period associated with direct delivery of RABV into nervous ending; suspected but could not confirm errors in PEP administration (e.g., failure to infiltrated all of the wounds with RIG) because two patients were seen at the clinic that day who later also developed rabies. | Patient treated the same day at the same clinic as another case (5-year-old M from Tarantola, A. et al. <sup>51</sup> ) with a PEP failure. Authors reported either RIG/vaccine potency confirmed by manufacturer or because given to another patient with an exposure to a confirmed rabid animal who did not get rabies after PEP. |
| Thongcharoen, P & Wasi, C <sup>25</sup> | 55        | F   | 1983        | Thailand            | No        | No                             | Unk                                                | Developed symptoms               | Yes: 7-year history of liver cirrhosis |                                               | Confirmed                | HDCV day 0, 3, 7, 14. ESSEN 6-dose. Administration route not stated. No deviations reported. Patient developed symptoms 3 days after 4th dose.  | Inadequate wound cleansing; RIG not administrated; cirrhosis of liver may have decreased immune response to HDCV vaccine; authors report that it is possible since patient was in malaria-endemic area that she could have been taking antimalarial medication that led to immunosuppression.                                                               | Vaccine lot given to another person who had adequate titers after PEP.                                                                                                                                                                                                                                                               |
| Tran, CH et al. <sup>55</sup>           | 6         | M   | 2014        | Vietnam             | Yes       | Unk                            | Unk                                                | No                               | Unk                                    | Not stated                                    | Probable                 | Modern cell culture vaccine day 0. Either ESSEN 5-dose or Updated Thai Red Cross pre-2018. Administration                                       | Did not follow PEP guidelines with sufficient vaccine.                                                                                                                                                                                                                                                                                                      |                                                                                                                                                                                                                                                                                                                                      |

| Publication*                                                                                                                                                                                                                                                                                                                                                                                                                                                                                                                                                                                                                                                                                                                              | Age (yrs) | Sex | Date of exp | Country of exposure | RIG given | Core practice: Wound care done | Core practice: Vaccine given in the gluteal muscle | Core practice: Vaccine completed | Reason for vaccine non-completion  | Immuno-compromised as reported by the authors | WHO case classification† | Vaccine regimen (number and spacing of doses, administration route, reported deviations, name of regimen)                                                                                    | Reasons for breakthrough infection according to author                                                                          | Other relevant data    |
|-------------------------------------------------------------------------------------------------------------------------------------------------------------------------------------------------------------------------------------------------------------------------------------------------------------------------------------------------------------------------------------------------------------------------------------------------------------------------------------------------------------------------------------------------------------------------------------------------------------------------------------------------------------------------------------------------------------------------------------------|-----------|-----|-------------|---------------------|-----------|--------------------------------|----------------------------------------------------|----------------------------------|------------------------------------|-----------------------------------------------|--------------------------|----------------------------------------------------------------------------------------------------------------------------------------------------------------------------------------------|---------------------------------------------------------------------------------------------------------------------------------|------------------------|
|                                                                                                                                                                                                                                                                                                                                                                                                                                                                                                                                                                                                                                                                                                                                           |           |     |             |                     |           |                                |                                                    |                                  |                                    |                                               |                          | route not reported. Patient received only one dose of vaccine.                                                                                                                               |                                                                                                                                 |                        |
| Tran, CH et al. <sup>55</sup>                                                                                                                                                                                                                                                                                                                                                                                                                                                                                                                                                                                                                                                                                                             | 72        | F   | 2014        | Vietnam             | Yes       | Unk                            | Unk                                                | No                               | Incorrect dosing (4 doses x 1 day) | Not stated                                    | Probable                 | Modern cell culture vaccine day 0. Either ESSEN 5-dose IM or Updated Thai Red Cross pre-2018. Administration route not reported. Received all four doses of vaccine the day of her exposure. | Did not follow PEP guidelines with incorrect vaccine administration.                                                            |                        |
| Wilde, H. et al. <sup>28</sup> and Fescharek, R et al. <sup>12</sup>                                                                                                                                                                                                                                                                                                                                                                                                                                                                                                                                                                                                                                                                      | 20        | M   | 1986        | Thailand            | Yes       | Yes                            | Yes                                                | Developed symptoms               |                                    | No                                            | Confirmed                | PCEC IM days 0,3, 7, 14. Regimen not specified. No deviations reported. Developed symptoms 5 days after 4th dose.                                                                            | 2-day delay in administration of RIG; wounds not infiltrated with RIG; received at least one dose of vaccine in gluteal muscle. | Reported as "healthy." |
| <p>* If a manuscript has two publications listed, the first one was the primary source.<br/> † Characterized as suspected, probable, or confirmed rabies cases based on standard definitions developed by WHO, which classify cases based on clinical symptoms, history of contact with a rabid animal, and laboratory testing.<sup>3</sup><br/> ** 2 cases from Kumar SK et al. were not included because we could not confirm the patients received modern cell culture vaccine.<br/> Exp: Exposure; WHO: World Health Organization; Unk: Unknown; PVRV: Purified Vero cell rabies vaccine; PCEC: Purified chick embryo cell rabies vaccine; HDCV: Human diploid cell vaccine; IM: Intramuscular; ID: Intradermal; SQ: Subcutaneous</p> |           |     |             |                     |           |                                |                                                    |                                  |                                    |                                               |                          |                                                                                                                                                                                              |                                                                                                                                 |                        |

**Table S5. Demographic and exposure characteristics of 56 breakthrough infections among confirmed human rabies cases with or without deviations from core practices.**

|                                                                                                                                                                                                                                                                                                                                                                                                                                                                                                                                                                                                                                                               | All cases (N=56) |     | Breakthrough infection with reported or possible deviations from core practices (N=24)* |     | Breakthrough infection without deviations from core practices (N=32)* |      |
|---------------------------------------------------------------------------------------------------------------------------------------------------------------------------------------------------------------------------------------------------------------------------------------------------------------------------------------------------------------------------------------------------------------------------------------------------------------------------------------------------------------------------------------------------------------------------------------------------------------------------------------------------------------|------------------|-----|-----------------------------------------------------------------------------------------|-----|-----------------------------------------------------------------------|------|
|                                                                                                                                                                                                                                                                                                                                                                                                                                                                                                                                                                                                                                                               | n                | %   | n                                                                                       | %   | n                                                                     | %    |
| <b>Age category (years)</b>                                                                                                                                                                                                                                                                                                                                                                                                                                                                                                                                                                                                                                   |                  |     |                                                                                         |     |                                                                       |      |
| 0-9                                                                                                                                                                                                                                                                                                                                                                                                                                                                                                                                                                                                                                                           | 16               | 29% | 2                                                                                       | 8%  | 14                                                                    | 44%  |
| 10-19                                                                                                                                                                                                                                                                                                                                                                                                                                                                                                                                                                                                                                                         | 12               | 21% | 7                                                                                       | 29% | 5                                                                     | 16%  |
| 20-29                                                                                                                                                                                                                                                                                                                                                                                                                                                                                                                                                                                                                                                         | 3                | 5%  | 3                                                                                       | 13% | 0                                                                     | 0%   |
| 30-39                                                                                                                                                                                                                                                                                                                                                                                                                                                                                                                                                                                                                                                         | 3                | 5%  | 1                                                                                       | 4%  | 2                                                                     | 6%   |
| 40-49                                                                                                                                                                                                                                                                                                                                                                                                                                                                                                                                                                                                                                                         | 1                | 2%  | 1                                                                                       | 4%  | 0                                                                     | 0%   |
| 50-59                                                                                                                                                                                                                                                                                                                                                                                                                                                                                                                                                                                                                                                         | 14               | 25% | 7                                                                                       | 29% | 7                                                                     | 22%  |
| 60-69                                                                                                                                                                                                                                                                                                                                                                                                                                                                                                                                                                                                                                                         | 6                | 11% | 3                                                                                       | 13% | 3                                                                     | 9%   |
| 70-79                                                                                                                                                                                                                                                                                                                                                                                                                                                                                                                                                                                                                                                         | 1                | 2%  | 0                                                                                       | 0%  | 1                                                                     | 3%   |
| ≥80                                                                                                                                                                                                                                                                                                                                                                                                                                                                                                                                                                                                                                                           | 0                | 0%  | 0                                                                                       | 0%  | 0                                                                     | 0%   |
| <b>Sex</b>                                                                                                                                                                                                                                                                                                                                                                                                                                                                                                                                                                                                                                                    |                  |     |                                                                                         |     |                                                                       |      |
| Female                                                                                                                                                                                                                                                                                                                                                                                                                                                                                                                                                                                                                                                        | 19               | 34% | 9                                                                                       | 38% | 10                                                                    | 31%  |
| Male                                                                                                                                                                                                                                                                                                                                                                                                                                                                                                                                                                                                                                                          | 37               | 66% | 15                                                                                      | 62% | 22                                                                    | 69%  |
| <b>Exposure (N=49 with reported data)</b>                                                                                                                                                                                                                                                                                                                                                                                                                                                                                                                                                                                                                     |                  |     | (N=17)                                                                                  |     | (N=32)                                                                |      |
| Dog                                                                                                                                                                                                                                                                                                                                                                                                                                                                                                                                                                                                                                                           | 49               | 82% | 14                                                                                      | 82% | 26                                                                    | 81%  |
| Fox                                                                                                                                                                                                                                                                                                                                                                                                                                                                                                                                                                                                                                                           | 3                | 6%  | 0                                                                                       | 0%  | 3                                                                     | 9%   |
| Wolf                                                                                                                                                                                                                                                                                                                                                                                                                                                                                                                                                                                                                                                          | 2                | 4%  | 0                                                                                       | 0%  | 2                                                                     | 6%   |
| Mongoose                                                                                                                                                                                                                                                                                                                                                                                                                                                                                                                                                                                                                                                      | 2                | 4%  | 1                                                                                       | 6%  | 1                                                                     | 3%   |
| Jackal                                                                                                                                                                                                                                                                                                                                                                                                                                                                                                                                                                                                                                                        | 1                | 2%  | 1                                                                                       | 6%  | 0                                                                     | 0%   |
| Emin's pouched rat ( <i>Cricetomys emini</i> )                                                                                                                                                                                                                                                                                                                                                                                                                                                                                                                                                                                                                | 0                | 0%  | 0                                                                                       | 0%  | 0                                                                     | 0%   |
| Feline                                                                                                                                                                                                                                                                                                                                                                                                                                                                                                                                                                                                                                                        | 1                | 2%  | 1                                                                                       | 6%  | 0                                                                     | 0%   |
| <b>Exposure type</b>                                                                                                                                                                                                                                                                                                                                                                                                                                                                                                                                                                                                                                          |                  |     |                                                                                         |     |                                                                       |      |
| Bite                                                                                                                                                                                                                                                                                                                                                                                                                                                                                                                                                                                                                                                          | 55               | 98% | 23                                                                                      | 96% | 32                                                                    | 100% |
| Scratch                                                                                                                                                                                                                                                                                                                                                                                                                                                                                                                                                                                                                                                       | 1                | 2%  | 1                                                                                       | 4%  | 0                                                                     | 0%   |
| Not specified                                                                                                                                                                                                                                                                                                                                                                                                                                                                                                                                                                                                                                                 | 0                | 0%  | 0                                                                                       | 0%  | 0                                                                     | 0%   |
| <b>Wound location (N=55 with reported data)</b>                                                                                                                                                                                                                                                                                                                                                                                                                                                                                                                                                                                                               |                  |     | (N=23)                                                                                  |     | (N=32)                                                                |      |
| Face/neck                                                                                                                                                                                                                                                                                                                                                                                                                                                                                                                                                                                                                                                     | 31               | 56% | 9                                                                                       | 39% | 22                                                                    | 69%  |
| Arms/hands                                                                                                                                                                                                                                                                                                                                                                                                                                                                                                                                                                                                                                                    | 26               | 47% | 12                                                                                      | 52% | 14                                                                    | 44%  |
| Trunk/back                                                                                                                                                                                                                                                                                                                                                                                                                                                                                                                                                                                                                                                    | 5                | 9%  | 2                                                                                       | 9%  | 3                                                                     | 9%   |
| Legs/feet                                                                                                                                                                                                                                                                                                                                                                                                                                                                                                                                                                                                                                                     | 9                | 16% | 6                                                                                       | 26% | 3                                                                     | 9%   |
| <b>Number of anatomical wound locations (N=55 with reported data)</b>                                                                                                                                                                                                                                                                                                                                                                                                                                                                                                                                                                                         |                  |     | (N=23)                                                                                  |     | (N=32)                                                                |      |
| 1                                                                                                                                                                                                                                                                                                                                                                                                                                                                                                                                                                                                                                                             | 39               | 71% | 17                                                                                      | 74% | 22                                                                    | 69%  |
| 2                                                                                                                                                                                                                                                                                                                                                                                                                                                                                                                                                                                                                                                             | 16               | 29% | 6                                                                                       | 26% | 10                                                                    | 31%  |
| 3                                                                                                                                                                                                                                                                                                                                                                                                                                                                                                                                                                                                                                                             | 0                | 0%  | 0                                                                                       | 0%  | 0                                                                     | 0%   |
| 4                                                                                                                                                                                                                                                                                                                                                                                                                                                                                                                                                                                                                                                             | 0                | 0%  | 0                                                                                       | 0%  | 0                                                                     | 0%   |
| * Breakthrough infections without deviations from core practices were defined as those for which the study reported wound cleaning (regardless of wound cleaning thoroughness), the study did not indicate a concern with the injection site of rabies vaccine(s) (i.e., about incorrect administration into the gluteal muscle); and the current authors could determine that vaccine doses had been given according to a validated vaccine schedule. Breakthrough infections with known or possible post-exposure prophylaxis deviations from core practices included those with deviations or possible deviations from at least one of the core practices. |                  |     |                                                                                         |     |                                                                       |      |

**Table S6. Clinical characteristics of 56 breakthrough infections among confirmed human rabies cases with or without deviations from core practices.**

| Time between exposure and outcomes (days)   | All cases (N=56)           |              |          | Breakthrough infection with reported or possible deviations from core practices (N=24)* |                |          | Breakthrough infection without deviations from core practices (N=32)* |              |          |
|---------------------------------------------|----------------------------|--------------|----------|-----------------------------------------------------------------------------------------|----------------|----------|-----------------------------------------------------------------------|--------------|----------|
|                                             | Total N with reported data | Median (IQR) | Range    | Total N with reported data                                                              | Median (IQR)   | Range    | Total N with reported data                                            | Median (IQR) | Range    |
| Exposure and wound care                     | 20                         | 0 (0-0)      | 0-22     | 4                                                                                       | 0 (0-0)        | 0-0      | 16                                                                    | 0 (0-0)      | 0-22     |
| Exposure and RIG administration             | 39                         | 0 (0-2)      | 0-31     | 13                                                                                      | 0 (0-1)        | 0-26     | 26                                                                    | 0 (0-2)      | 0-31     |
| Exposure and vaccine administration         | 54                         | 0 (0-1)      | 0-22     | 22                                                                                      | 0 (0-1)        | 0-2      | 32                                                                    | 0 (0-1·5)    | 0-22     |
| Exposure and rabies symptom onset           | 51                         | 20 (17-23)   | 9-60     | 20                                                                                      | 20·5 (18-23·5) | 9-60     | 31                                                                    | 20 (16-23)   | 11-39    |
| Exposure to death                           | 43                         | 30 (22-37)   | 13-70    | 14                                                                                      | 32·5 (22-37)   | 13-70    | 29                                                                    | 28 (25-37)   | 15-61    |
| <b>Rabies immunoglobulin administration</b> |                            | <b>n</b>     | <b>%</b> |                                                                                         | <b>n</b>       | <b>%</b> |                                                                       | <b>n</b>     | <b>%</b> |
| RIG given                                   | 56                         | 40           | 71%      | 24                                                                                      | 13             | 54%      | 32                                                                    | 27           | 84%      |
| <b>Type of RIG</b>                          |                            |              |          |                                                                                         |                |          |                                                                       |              |          |
| Human RIG                                   | 40                         | 22           | 55%      | 13                                                                                      | 10             | 77%      | 27                                                                    | 12           | 44%      |
| Equine RIG                                  | 40                         | 17           | 43%      | 13                                                                                      | 2              | 15%      | 27                                                                    | 15           | 56%      |
| Not Specified                               | 40                         | 1            | 2%       | 13                                                                                      | 1              | 8%       | 27                                                                    | 0            | 0%       |

\* Breakthrough infections without deviations from core practices were defined as those for which the study reported wound cleaning (regardless of wound cleaning thoroughness), the study did not indicate a concern with the injection site of rabies vaccine(s) (i.e., about incorrect administration into the gluteal muscle); and the current authors could determine that vaccine doses had been given according to a validated vaccine schedule. Breakthrough infections with known or possible post-exposure prophylaxis deviations from core practices included those with deviations or possible deviations from at least one of the core practices. RIG: rabies immunoglobulin.



**Table S7. Potential causes of 56 breakthrough infections among confirmed human rabies cases with or without deviations from core practices.**

|                                                                                                                                                                                                                                                                                                                                                                                                                                                                                                                                                                                                                                                                                                                                                                                                                                                                                                                                                                                                                                                                                                                                                       | Breakthrough infection with reported or possible deviations from core practices (N=24)* |               |            | Breakthrough infection without deviations from core practices (N=32)* |               |            |
|-------------------------------------------------------------------------------------------------------------------------------------------------------------------------------------------------------------------------------------------------------------------------------------------------------------------------------------------------------------------------------------------------------------------------------------------------------------------------------------------------------------------------------------------------------------------------------------------------------------------------------------------------------------------------------------------------------------------------------------------------------------------------------------------------------------------------------------------------------------------------------------------------------------------------------------------------------------------------------------------------------------------------------------------------------------------------------------------------------------------------------------------------------|-----------------------------------------------------------------------------------------|---------------|------------|-----------------------------------------------------------------------|---------------|------------|
|                                                                                                                                                                                                                                                                                                                                                                                                                                                                                                                                                                                                                                                                                                                                                                                                                                                                                                                                                                                                                                                                                                                                                       | Total N with complete data                                                              | n             | %          | Total N with complete data                                            | n             | %          |
| <b>Healthcare provider contributions</b>                                                                                                                                                                                                                                                                                                                                                                                                                                                                                                                                                                                                                                                                                                                                                                                                                                                                                                                                                                                                                                                                                                              |                                                                                         |               |            |                                                                       |               |            |
| <i><b>Wound care</b></i>                                                                                                                                                                                                                                                                                                                                                                                                                                                                                                                                                                                                                                                                                                                                                                                                                                                                                                                                                                                                                                                                                                                              |                                                                                         |               |            |                                                                       |               |            |
| No appropriate wound care                                                                                                                                                                                                                                                                                                                                                                                                                                                                                                                                                                                                                                                                                                                                                                                                                                                                                                                                                                                                                                                                                                                             | 24                                                                                      | 8             | 33%        | 32                                                                    | 0             | 0%         |
| No information on wound care                                                                                                                                                                                                                                                                                                                                                                                                                                                                                                                                                                                                                                                                                                                                                                                                                                                                                                                                                                                                                                                                                                                          | 24                                                                                      | 12            | 50%        | 32                                                                    | 0             | 0%         |
| <i><b>Vaccine administration</b></i>                                                                                                                                                                                                                                                                                                                                                                                                                                                                                                                                                                                                                                                                                                                                                                                                                                                                                                                                                                                                                                                                                                                  |                                                                                         |               |            |                                                                       |               |            |
| Vaccine administration in the gluteal muscle                                                                                                                                                                                                                                                                                                                                                                                                                                                                                                                                                                                                                                                                                                                                                                                                                                                                                                                                                                                                                                                                                                          | 24                                                                                      | 3             | 13%        | 32                                                                    | 0             | 0%         |
| Did not complete vaccine series (reason unknown)                                                                                                                                                                                                                                                                                                                                                                                                                                                                                                                                                                                                                                                                                                                                                                                                                                                                                                                                                                                                                                                                                                      | 24                                                                                      | 0             | 0%         | 32                                                                    | 0             | 0%         |
| Received incorrect vaccine regimen                                                                                                                                                                                                                                                                                                                                                                                                                                                                                                                                                                                                                                                                                                                                                                                                                                                                                                                                                                                                                                                                                                                    | 24                                                                                      | 1             | 4%         | 32                                                                    | 0             | 0%         |
| Vaccine regimen and series completion unknown                                                                                                                                                                                                                                                                                                                                                                                                                                                                                                                                                                                                                                                                                                                                                                                                                                                                                                                                                                                                                                                                                                         | 24                                                                                      | 3             | 13%        | 32                                                                    | 0             | 0%         |
| Developed symptoms prior to completion of vaccine series                                                                                                                                                                                                                                                                                                                                                                                                                                                                                                                                                                                                                                                                                                                                                                                                                                                                                                                                                                                                                                                                                              | 24                                                                                      | 15            | 63%        | 32                                                                    | 30            | 94%        |
| <i><b>RIG administration</b></i>                                                                                                                                                                                                                                                                                                                                                                                                                                                                                                                                                                                                                                                                                                                                                                                                                                                                                                                                                                                                                                                                                                                      |                                                                                         |               |            |                                                                       |               |            |
| No RIG administered                                                                                                                                                                                                                                                                                                                                                                                                                                                                                                                                                                                                                                                                                                                                                                                                                                                                                                                                                                                                                                                                                                                                   | 24                                                                                      | 11            | 48%        | 32                                                                    | 5             | 16%        |
| Of people who received RIG:                                                                                                                                                                                                                                                                                                                                                                                                                                                                                                                                                                                                                                                                                                                                                                                                                                                                                                                                                                                                                                                                                                                           |                                                                                         |               |            |                                                                       |               |            |
| RIG given IM only                                                                                                                                                                                                                                                                                                                                                                                                                                                                                                                                                                                                                                                                                                                                                                                                                                                                                                                                                                                                                                                                                                                                     | 13                                                                                      | 8             | 62%        | 27                                                                    | 2             | 7%         |
| Wound sutured before RIG                                                                                                                                                                                                                                                                                                                                                                                                                                                                                                                                                                                                                                                                                                                                                                                                                                                                                                                                                                                                                                                                                                                              | 13                                                                                      | 1             | 8%         | 27                                                                    | 1             | 4%         |
| Not all wounds infiltrated with RIG                                                                                                                                                                                                                                                                                                                                                                                                                                                                                                                                                                                                                                                                                                                                                                                                                                                                                                                                                                                                                                                                                                                   | 13                                                                                      | 1             | 8%         | 27                                                                    | 2             | 7%         |
| <b>Patient behaviors</b>                                                                                                                                                                                                                                                                                                                                                                                                                                                                                                                                                                                                                                                                                                                                                                                                                                                                                                                                                                                                                                                                                                                              | <b>Total N with complete data</b>                                                       | <b>Median</b> | <b>IQR</b> | <b>Total N with complete data</b>                                     | <b>Median</b> | <b>IQR</b> |
| Time from exposure to wound care (days)                                                                                                                                                                                                                                                                                                                                                                                                                                                                                                                                                                                                                                                                                                                                                                                                                                                                                                                                                                                                                                                                                                               | 4                                                                                       | 0             | 0-0        | 16                                                                    | 0             | 0-0        |
| Time from exposure to vaccine administration (days)                                                                                                                                                                                                                                                                                                                                                                                                                                                                                                                                                                                                                                                                                                                                                                                                                                                                                                                                                                                                                                                                                                   | 22                                                                                      | 0             | 0-1        | 32                                                                    | 0             | 0-1.5      |
| Time from exposure to RIG administration (days)                                                                                                                                                                                                                                                                                                                                                                                                                                                                                                                                                                                                                                                                                                                                                                                                                                                                                                                                                                                                                                                                                                       | 13                                                                                      | 0             | 0-1        | 26                                                                    | 0             | 0-2        |
|                                                                                                                                                                                                                                                                                                                                                                                                                                                                                                                                                                                                                                                                                                                                                                                                                                                                                                                                                                                                                                                                                                                                                       | <b>Total N with complete data</b>                                                       | <b>n</b>      | <b>%</b>   | <b>Total N with complete data</b>                                     | <b>n</b>      | <b>%</b>   |
| Did not return for additional doses of vaccine                                                                                                                                                                                                                                                                                                                                                                                                                                                                                                                                                                                                                                                                                                                                                                                                                                                                                                                                                                                                                                                                                                        | 24                                                                                      | 0             | 0%         | 32                                                                    | 0             | 0%         |
| <b>Anatomic and health status attributes</b>                                                                                                                                                                                                                                                                                                                                                                                                                                                                                                                                                                                                                                                                                                                                                                                                                                                                                                                                                                                                                                                                                                          | <b>Total N with complete data</b>                                                       | <b>n</b>      | <b>%</b>   | <b>Total N with complete data</b>                                     | <b>n</b>      | <b>%</b>   |
| Wounds to the head, neck, or face                                                                                                                                                                                                                                                                                                                                                                                                                                                                                                                                                                                                                                                                                                                                                                                                                                                                                                                                                                                                                                                                                                                     | 23                                                                                      | 9             | 39%        | 32                                                                    | 22            | 69%        |
| Exposed at two or more anatomical locations                                                                                                                                                                                                                                                                                                                                                                                                                                                                                                                                                                                                                                                                                                                                                                                                                                                                                                                                                                                                                                                                                                           | 23                                                                                      | 6             | 26%        | 32                                                                    | 10            | 31%        |
| Immunosuppression                                                                                                                                                                                                                                                                                                                                                                                                                                                                                                                                                                                                                                                                                                                                                                                                                                                                                                                                                                                                                                                                                                                                     | 24                                                                                      | 3‡            | 13%        | 32                                                                    | 3¶            | 9%         |
| <b>Integrity of PEP biologics</b>                                                                                                                                                                                                                                                                                                                                                                                                                                                                                                                                                                                                                                                                                                                                                                                                                                                                                                                                                                                                                                                                                                                     |                                                                                         |               |            |                                                                       |               |            |
| RIG potency testing done**                                                                                                                                                                                                                                                                                                                                                                                                                                                                                                                                                                                                                                                                                                                                                                                                                                                                                                                                                                                                                                                                                                                            | 24                                                                                      | 0             | 0%         | 32                                                                    | 2             | 6%         |
| Vaccine potency testing done**                                                                                                                                                                                                                                                                                                                                                                                                                                                                                                                                                                                                                                                                                                                                                                                                                                                                                                                                                                                                                                                                                                                        | 24                                                                                      | 2             | 8%         | 32                                                                    | 1             | 3%         |
| <p>* Breakthrough infections without deviations from core practices were defined as those for which the study reported wound cleaning (regardless of wound cleaning thoroughness), the study did not indicate a concern with the injection site of rabies vaccine(s) (i.e., about incorrect administration into the gluteal muscle); and the current authors could determine that vaccine doses had been given according to a validated vaccine schedule. Breakthrough infections with known or possible post-exposure prophylaxis deviations from core practices included those with deviations or possible deviations from at least one of the core practices.</p> <p>‡ Immunosuppressing conditions specified as liver cirrhosis secondary to alcoholism (n=1), age-related immunosuppression (n=1), and unspecified “advanced immunodeficiency” (n=1).</p> <p>¶ Immunosuppressing conditions specified as uncontrolled diabetes (n=1) and liver cirrhosis secondary to alcoholism (n=2).</p> <p>** All RIG and vaccine tested were found potent.</p> <p>IQR: Interquartile range; RIG: Rabies immunoglobulin; PEP: Post-exposure prophylaxis.</p> |                                                                                         |               |            |                                                                       |               |            |

## References

1. World Health Organization (WHO). WHO Expert Consultation on Rabies, first report. Geneva: World Health Organization; 2004.
2. WHO. WHO Expert Consultation on Rabies, second report. Geneva: World Health Organization; 2013.
3. WHO. WHO Expert Consultation on Rabies, third report. Vol. 931, World Health Organization technical report series. Geneva: World Health Organization; 2018.
4. Amin MR, Chowdhury S, Enam S, Rahman S, Hossain AR, Salimuzzaman M, et al. Two cases of dog bite with similar clinical presentation but outcome variation - A case report. *J Med.* 2013;14(2):213–7.
5. Bharti OK, Tekta D, Shandil A, Sharma K, Kapila P. Failure of postexposure prophylaxis in a girl child attacked by rabid dog severing her facial nerve causing possible direct entry of rabies virus into the facial nerve. *Hum Vaccines Immunother.* 2019;15(11):2612–4.
6. Chaitra KM, Ballal S, Masthi NRR, Ashwath Narayana DH, Yashodha HT, Kumar M, et al. Rabies encephalitis in a preschool child following postexposure prophylaxis. *PLoS Negl Trop Dis.* 2021 Feb 18;15(2):e0009045.
7. Deshmukh R, Yemul V. Fatal Rabies Encephalitis Despite Post-Exposure Vaccination in a Diabetic Patient: A Need for the Use of Rabies Immune Globulin in All Post-Exposure Cases. *J Assoc Physicians India.* 1999;47(5):546–7.
8. Dutta J. Rabies Prevention: Cost to an Indian Laborer. *JAMA.* 1996;276(1):32.
9. Farahatj F, Fayaz A, Howaizi N, Biglari P, Gholami A. Human rabies in Iran. *Trop Doct.* 2014 Oct 24;44(4):226–9.
10. Fescharek R, Franke V, Samuel M. Do anaesthetics and surgical stress increase the risk of post-exposure rabies treatment failure? *Vaccine.* 1994;12(1):12–3.
11. Wilde H, Sirikawin S, Sabcharoen A, Kingnate D, Tantawichien T, Harischandra PAL, et al. Failure of postexposure treatment of rabies in children. *Clin Infect Dis.* 1996;22:228–32.
12. Fescharek R, Schwarz S, Quast U, Gandhi N, Karkhanis S. Postexposure rabies prophylaxis: when the guidelines are not respected. *Vaccine.* 1991;9(12):868–72.
13. Gacouin A, Bourhy H, Renaud JC, Camus C, Suprin E, Thomas R. Human rabies despite postexposure vaccination. *Eur J Clin Microbiol Infect Dis.* 1999;18(3):233–5.
14. Hemachudha T, Mitrabhakdi E, Wilde H, Vejabhuti A, Siripataravanit S, Kingnate D. Additional reports of failure to respond to treatment after rabies exposure in Thailand. *Clin Infect Dis.* 1999;28(1):143–4.
15. Wilde H. Failures of post-exposure rabies prophylaxis. *Vaccine.* 2007 Nov;25(44):7605–9.
16. Jain RS, Gupta PK, Handa R, Tejwani S, Prakash S, Kumar S, et al. Paralytic rabies or postvaccination myelitis: a diagnostic dilemma. *Am J Emerg Med.* 2015 Apr;33(4):601.e1-601.e3.
17. John B, Patnaik S. Fatal rabies despite appropriate post-exposure prophylaxis. *Indian Pediatr.* 2005;42:839–40.
18. Khalsi F, Ayari A, Romdhane M Ben, Tinsa F, Boussetta K. Rabies encephalitis in children: a resurgence of a fatal anthroozoonosis. *Afr Health Sci.* 2018 Aug 14;18(3):539–41.
19. Quiambao BP, Dy-Tioco HZ, Dizon RM, Crisostomo ME, Teuwen DE. Rabies post-exposure prophylaxis with purified equine rabies immunoglobulin: One-year follow-up of patients with laboratory-confirmed category III rabies exposure in the Philippines. *Vaccine.* 2009 Nov;27(51):7162–6.
20. Ren J, Gong Z, Chen E, Lin J, Lv H, Wang W, et al. Human rabies in Zhejiang Province, China. *Int J Infect Dis.* 2015 Sep;38:77–82.
21. Scrimgeour EM, Mehta FR. Rabies in Oman: Failed postexposure vaccination in a lactating woman bitten by a fox. *Int J Infect Dis.* 2001;5(3):160–2.
22. Shantavasinkul P, Tantawichien T, Wacharapluesadee S, Jeamanukoolkit A, Udomchaisakul P, Chattranukulchai P, et al. Failure of Rabies Postexposure Prophylaxis In Patients Presenting with Unusual Manifestations. *Clin Infect Dis.* 2010 Jan;50(1):77–9.
23. Smith MS, Janse van Rensburg MN. Post-exposure rabies prophylaxis. *South African Med J.* 1988;74:88–9.
24. Sriaroon C, Daviratanasilpa S, Sansomranjai P, Khawplod P, Hemachudha T, Khamoltham T, et al. Rabies in a Thai child treated with the eight-site post-exposure regimen without rabies immune globulin. *Vaccine.* 2003 Sep;21(25–26):3525–6.
25. Thongcharoen P, Wasi C. Possible factors influencing unsuccessful protection of post-exposure prophylaxis for rabies by human diploid cel vaccine. *Chot Mai Het Thang Phaet.* 1985;68(7):386–7.
26. Tinsa F, Borgi A, Jahouat I, Boussetta K. Rabies encephalitis in a child: a failure of rabies post exposure prophylaxis? *BMJ Case Rep.* 2015 Jan 14;2015(jan14 1):1–3.

27. Wattanasri S, Boonthai P, Thongcharoen P. Human rabies after late administration of human diploid cell vaccine without hyperimmune serum. *Lancet*. 1982;2:870.
28. Wilde H, Choomkasiem P, Hemachudha T, Supich C, Chutivongse S. Failure of rabies postexposure treatment in Thailand. *Vaccine*. 1989;7(1):49–52.
29. Bennisrallah C, Ben Fredj M, Mhamdi M, Kacem M, Dhoub W, Zemni I, et al. Animal bites and post-exposure prophylaxis in Central-West Tunisia: a 15-year surveillance data. *BMC Infect Dis*. 2021 Dec 27;21(1):1013.
30. Bharti OK, Sharma V. Failure of Postexposure Prophylaxis in A Patient Given Rabies Vaccine Intramuscularly in the Gluteus Muscle, Himachal Pradesh, India. *Indian J Crit Care Med*. 2018 Mar;22(3):189–90.
31. Changalucha J, Steenson R, Grieve E, Cleaveland S, Lembo T, Lushasi K, et al. The need to improve access to rabies post-exposure vaccines: Lessons from Tanzania. *Vaccine*. 2019 Oct;37:A45–53.
32. Deshmukh DG, Damle AS, Bajaj JK, Bhakre JB, Patil NS. Fatal rabies despite post-exposure prophylaxis. *Indian J Med Microbiol*. 2011;29(2):178–81.
33. Devriendt J, Staroukine M, Costy F, Vanderhaeghen J-J. Fatal Encephalitis Apparently due to Rabies: Occurrence After Treatment With Human Diploid Cell Vaccine But Not Rabies Immune Globulin. *JAMA*. 1982;248(18):2304–6.
34. Fescharek R, Franke V. Dangers of immunosuppressive treatments in postexposure rabies prophylaxis. *Vaccine*. 1990 Dec;8:172–3.
35. Bock HL, Barth R, von Hedenstrom M. Rabies despite post-exposure vaccine treatment with cell culture vaccines - A review of published cases. *Prog Rabies Control*. 1988;435–40.
36. Gadekar RD, Dimple VK, Inamdar IF, Aswar NR, Doibale MK. Same dog bite and different outcome in two cases - Case report. *J Clin Diagnostic Res*. 2014;8(6):11–2.
37. Gajurel BP, Gautam N, Shrestha A, Bogati N, Bista M, Ojha R, et al. Magnetic resonance imaging abnormalities in encephalomyelitis due to paralytic rabies: A case report. *Clin Case Reports*. 2022 Jan 18;10(1):10–5.
38. Gerber F, Tetchi M, Kallo V, Léchenne M, Hattendorf J, Bonfoh B, et al. RABIES IMMUNOGLOBULIN: Brief history and recent experiences in Côte d'Ivoire. *Acta Trop*. 2020 Nov;211(July):105629.
39. Ghosh J, Roy M, Lahiri K, Bala A, Roy M. Acute flaccid paralysis due to rabies. *J Pediatr Neurosci*. 2009;4(1):33–5.
40. Gowda VK, Basavaraja G, Reddy H, Ramaswamy P. Paralytic rabies following cat scratch and intra-dermal anti-rabies vaccination. *J Pediatr Neurosci*. 2014;9(2):154.
41. Kumar S, Gupta P, Panda P. Death from rabies: The reason being poor compliance to vaccination or its failure. *J Fam Med Prim Care*. 2020;9(8):4437.
42. Kuwert E, Scheiermann N. Rabies: Post-Exposure Prophylaxis in Man. *Ann Inst Pasteur Virol*. 1985;136E:425–45.
43. Lumbiganon P, Bunyahotra V, Pariojkul C. Human rabies despite treatment with rabies immune globulin and human diploid cell rabies vaccine - Thailand. *JAMA*. 1988;259(1):25.
44. Madhusudana SN, Aggarwal P, Tripathi KK. Failure of rabies postexposure treatment with purified chick embryo cell (PCEC) vaccine. *Vaccine*. 1989;7:478–9.
45. Mohindra R, Suri V, Chatterjee D, Rana K. Measuring antibody titres following rabies postexposure prophylaxis in immunosuppressed patients: a norm rather than the exception. *BMJ Case Rep*. 2021 Nov;14(11):e245171.
46. Mohite A, Prasad V, Rajam L, Madhusudana SN. Rabies encephalitis. *Indian Pediatr*. 2007 Apr;44(9):702–4.
47. Monson MH. Practical management of rabies. *Trop Doct*. 1985;(April):50–4.
48. Nadeem M, Panda P. Survival in human rabies but left against medical advice and death followed – Community education is the need of the hour. *J Fam Med Prim Care*. 2020;9(3):1736.
49. Pannu AK, Kumar RV, Vijaykumar D, Priya L, Singh H, Bhalla A. Paralytic rabies: An acute flaccid myelitis after inadequate post exposure prophylaxis. *Trop Doct*. 2019;49(4):301–2.
50. Rasooli A, Pourhossein B, Bashar R, Shirzadi MR, Amiri B, Vadaye Kheiri E, et al. Investigating Possible Etiologies of Post-Exposure Prophylaxis Failure and Deaths From Rabies Infection: Case Reports. *Int J Med Toxicol Forensic Med*. 2020 Sep 27;10(3):27378.
51. Sadeghi M, Moallem SH, Yousefi-Abdolmaki E, Montazeri M. The rabies early death phenomenon: A report of ineffective administration of rabies vaccine during symptomatic disease. *Indian J Crit Care Med*. 2015 Jul;19(7):422–4.
52. Shill M, Baynes RD, Miller SD. Fatal Rabies Encephalitis Despite Appropriate Post-Exposure Prophylaxis. *N Engl J Med*. 1987;316(20):1257–8.

53. Tabbara KF, Al-Omar O. Eyelid Laceration Sustained in an Attack by a Rabid Desert Fox. *Am J Ophthalmol.* 1995 May;119(5):651–2.
54. Tarantola A, Ly S, Chan M, In S, Peng Y, Hing C, et al. Intradermal rabies post-exposure prophylaxis can be abridged with no measurable impact on clinical outcome in Cambodia, 2003–2014. *Vaccine.* 2019;37:A118–27.
55. Tran CH, Afriyie DO, Pham TN, Otsu S, Urabe M, Dang AD, et al. Rabies post-exposure prophylaxis initiation and adherence among patients in Vietnam, 2014–2016. *Vaccine.* 2019;37:A54–63.
